1 Exposure to the oral host niche yields rapid phenotypic and genotypic diversification in *Candida*  
2 *albicans*

3 Forche, A.<sup>1\*</sup>, Cromie, G.<sup>2</sup>, Gerstein, A.C.<sup>3</sup>, Solis, N. V.<sup>4</sup>, Pisithkul, Z.<sup>1</sup>, Srifa, W.<sup>1</sup>, Jeffery, E.<sup>2</sup>,  
4 Filler, S.G.<sup>4</sup>, Dudley, A.M.<sup>2</sup>, Berman, J.<sup>5</sup>

5 <sup>1</sup>Department of Biology, Bowdoin College, Brunswick, ME USA

6 <sup>2</sup>Pacific Northwest Research Institute, Seattle, WA, USA

7 <sup>3</sup>Department of Microbiology & Immunology, University of Minnesota, Minneapolis MN USA

8 <sup>4</sup>Division of Infectious Diseases, Los Angeles Biomedical Research Institute at Harbor-UCLA  
9 Medical Center, Torrance, CA USA; Department of Medicine, David Geffen School of Medicine  
10 at UCLA, Los Angeles, CA USA

11 <sup>5</sup>School of Molecular Cell Biology & Biotechnology, George S. Wise Faculty of Life Sciences,  
12 Tel Aviv University, Tel Aviv, Israel

13 ORCID for AMD 0000-0003-3644-0625

14 ORCID for AF 0000-0002-3004-5176

15

16 Keywords: *Candida albicans*, aneuploidy, loss of heterozygosity, oropharyngeal Candidiasis,  
17 hypervariability, colony phenotype

18

19

20 \*To whom correspondence should be address:

21 Anja Forche PhD

22 Research Assistant Professor

23 Bowdoin College

24 Department of Biology

25 6500 College Station

26 Brunswick, ME 04011

27 USA

28 Email: [aforche@bowdoin.edu](mailto:aforche@bowdoin.edu)

29 Phone: 1-207-725-3365

30

31

## 32 **Abstract**

33 *In vitro* studies suggest that stress may generate random standing variation, and that different  
34 cellular and ploidy states may evolve more rapidly under stress. Yet this idea has not been  
35 tested with pathogenic fungi growing within their host niche *in vivo*. Here, we analyzed the  
36 generation of both genotypic and phenotypic diversity during exposure of *Candida albicans* to  
37 the mouse oral cavity. Ploidy, aneuploidy, loss of heterozygosity (LOH) and recombination were  
38 determined using flow cytometry and ddRADseq. Colony phenotypic changes (CPs) in size and  
39 filamentous growth were evident without selection, and were enriched among colonies selected  
40 for LOH of the *GAL1* marker. Aneuploidy and LOH occurred on all chromosomes (Chrs), with  
41 aneuploidy more frequent for smaller Chrs and whole Chr LOH more frequent for larger Chrs.  
42 Large genome shifts in ploidy to haploidy often maintained one or more heterozygous disomic  
43 Chrs, consistent with random Chr missegregation events. Most isolates displayed several  
44 different types of genomic changes, suggesting that the oral environment rapidly generates  
45 diversity *de novo*. In sharp contrast, following *in vitro* propagation isolates were not enriched for  
46 multiple LOH events, except in those that underwent haploidization and/or had high levels of  
47 Chr loss. The frequency of events was overall 100 times higher for *C. albicans* populations  
48 following *in vivo* passage compared to *in vitro*. These hyperdiverse *in vivo* isolates likely provide  
49 *C. albicans* with the ability to adapt rapidly to the diversity of stress environments it encounters  
50 inside the host.

51

## 52 **Author summary**

53 Adaption is a continuous dynamic process that requires genotypic and phenotypic  
54 variation. Here we studied the effects of a single passage in a mouse oropharyngeal model of  
55 infection on the appearance of diversity in *C. albicans*, a common commensal of the human oral  
56 cavity and GI tract. We found that variation could be rapidly detected following oral colonization,

57 with the frequency of genome change being considerably higher with pre-selection for  
58 recombination and colony phenotypic changes. Importantly, one third of all isolates had multiple  
59 genome changes, significantly higher than expected by chance alone. We suggest that some  
60 cells in the population are naturally hypervariable and that they are a major source of diversity  
61 upon which selection can act in stressful conditions *in vivo* and *in vitro*.

62

## 63 **Introduction**

64 *Candida albicans* is a common commensal of the human GI tract and the oral cavity in  
65 healthy individuals, and also an opportunistic pathogen, especially in immunocompromised  
66 patients (CALDERONE 2012). In healthy people, the fungus is prevented from causing disease by  
67 the resident microbiota and the host immune system (LORENZ *et al.* 2004; RICHARDSON AND  
68 RAUTEMAA 2009). However, immune deficiencies or a minor imbalance of the microbiota (e.g.,  
69 through administration of antibiotics) can be sufficient to cause superficial infections. During the  
70 course of infection, *C. albicans* encounters many different host environments to which it must  
71 adapt rapidly. Furthermore, it must cope with environmental fluctuations in established niches  
72 during long-term persistence in the host (STAIB *et al.* 2001). Determining the genetic and  
73 phenotypic changes that accompany the establishment of commensalism and the transition to  
74 pathogenicity (and hence how they can be prevented) is not known (NAGLIK *et al.* 2003; WILSON  
75 *et al.* 2009).

76 Several studies strongly suggest that *C. albicans* may have a very different arsenal of  
77 adaptation mechanisms when in direct contact with the host compared to laboratory conditions.  
78 For example, a novel cell phenotype (GUT) is unique to the commensal environment of the  
79 gastrointestinal tract (PANDE *et al.* 2013) and several genes (e.g., Cph2, Tec1) are specifically  
80 expressed under commensal conditions (ROSENBAACH *et al.* 2010). Furthermore, cells in the  
81 commensal state express genes that suggest the presence of at least two sub-populations of  
82 exponentially growing cells alongside stationary-phase cells. In addition, the expression patterns

83 of several genes are clearly distinct during growth *in vivo* vs *in vitro* (NOBILE *et al.* 2006;  
84 VANDEPUTTE *et al.* 2011; FANNING *et al.* 2012; LOHBERGER *et al.* 2014).

85 Recent studies in fungi found that genome instability caused by large-scale  
86 chromosomal changes, including gross chromosomal rearrangements (GCRs), supernumerary  
87 Chrs (SNCs), aneuploidy and loss of heterozygosity (LOH), are more frequent under stress  
88 conditions *in vitro* and *in vivo* (RUSTCHENKO *et al.* 1997; SELMECKI *et al.* 2006; COYLE AND KROLL  
89 2008; POLAKOVA *et al.* 2009; FORCHE *et al.* 2009a; FORCHE *et al.* 2011; HICKMAN *et al.* 2013).  
90 Aneuploidy in particular has been shown to be one of the mechanisms that can lead to  
91 antifungal drug resistance in pathogenic fungi including *Cryptococcus neoformans* and *Candida*  
92 *glabrata* (SELMECKI *et al.* 2006; POLAKOVA *et al.* 2009; SIONOV *et al.* 2010). Interestingly, a  
93 recent study showed that *C. albicans* forms very large cells in response to acute micronutrient  
94 limitation, in particular to zinc. Cell size has been shown to be correlated with ploidy (HICKMAN *et*  
95 *al.* 2013) and indeed flow cytometry data support that these gigantic cells may be aneuploid  
96 (MALAVIA *et al.* 2017). In *C. neoformans*, Titan cells are large polyploid cells that can rapidly  
97 produce drug resistant aneuploid daughters upon exposure to the drug fluconazole (GERSTEIN  
98 *et al.* 2015), supporting the idea that aneuploidy is a common adaptation mechanism of  
99 pathogenic fungi.

100 Our previous study of ~80 *C. albicans* isolates recovered from the mouse model of  
101 hematogenously disseminated candidiasis (BSI) from mice kidneys (FORCHE *et al.* 2003;  
102 FORCHE *et al.* 2009a) provided a first glimpse into the types of genomic changes that *C.*  
103 *albicans* undergoes at the population level. We discovered higher rates of phenotypic and Chr-  
104 level genetic variation following passage of *C. albicans in vivo* relative to passage *in vitro*. In  
105 addition, missegregation events, including whole Chr aneuploidy and LOH, were positively  
106 associated with altered CPs.

107           The oral cavity is one of the few host niches that is both a commensal and pathogenic  
108 niche (VARGAS AND JOLY 2002; PATIL *et al.* 2015). *C. albicans* has been found as part of the  
109 commensal microflora in up to two thirds of the healthy population (VILLAR AND DONGARI-  
110 BAGTZOGLU 2008; PANKHURST 2013). Oral and oropharyngeal candidiasis can develop as  
111 consequence of developed immunodeficiency (e.g. HIV/AIDS), underlying diseases such as  
112 diabetes, and treatment with broad-spectrum antibiotic, corticosteroids and chemotherapy  
113 (SOBUE *et al.* ; LYON *et al.* 2006; LU *et al.* 2017). In the oral niche, fungal-host interactions are  
114 highly dynamic due to a multitude of factors including the presence of antimicrobial salivary  
115 peptides and the microbiota of bacterial and fungal species that co-exist and compete for  
116 nutrients on epithelial cells (DEMUYSER *et al.* 2014; JAKUBOVICS 2015) and the highly fluctuating  
117 environmental conditions (e.g., temperature, pH) (PARK *et al.* 2009). Unexpectedly, we recently  
118 identified haploid, mating-competent *C. albicans* isolates for the first time, and most of these  
119 haploids were recovered after *in vivo* passage in an oral model of infection (HICKMAN *et al.*  
120 2013). This extraordinary finding highlights the contribution of and the need for *in vivo* studies to  
121 the discovery of novel aspects of *Candida* biology in general and of host-pathogen interactions  
122 in particular.

123           To further our understanding on the acquisition of standing variation of *C. albicans*  
124 during infection, we performed experimental evolution of *Candida albicans* in mice to analyze  
125 the appearance of genotypic and phenotypic diversity during passage through the mouse oral  
126 cavity for 1, 2, 3 or 5 days using an oropharyngeal model of infection (KAMAI *et al.* 2001; SOLIS  
127 AND FILLER 2012). We found that diversity is rapidly generated after exposure to the oral host  
128 niche, and that many of these changes are identified in multiple mice. The overall high within-  
129 mouse diversity and multiple changes per isolate was high independent of the duration of  
130 infection. Surprisingly, the generation of multiple genetic changes in a single isolate appears to  
131 occur with higher frequency than would be expected by random chance alone. Taken together,

132 our results suggest that exposure to the host (and/or the transition from *in vitro* to *in vivo* growth  
133 conditions) generates highly variable isolates at a frequency 2 orders of magnitude higher than  
134 *in vitro*.

135

## 136 **Methods**

### 137 Isolate maintenance and DNA extraction

138 Strains used to generate parental strain YJB9318 are listed on Table S1. YJB9318 and  
139 recovered isolates were grown on YPD (2% glucose, 1% yeast extract, 1% bacto peptone, 20  
140 mg/L uridine with 1.5% agar added for plate cultures). Gal phenotypes were assessed on MIN-  
141 Gal (0.67% yeast nitrogen base without amino acids, 2% galactose, 1.5% agar; only Gal<sup>+</sup>  
142 isolates grow) and 2-deoxygalactose medium (2DOG; 0.1% 2-deoxygalactose, 0.5% raffinose,  
143 glycerol, 1.5% agar; only Gal<sup>-</sup> isolates grow). All isolates are stored long-term in 50% glycerol at  
144 -80°C. DNA extractions were performed as described previously (SELMECKI *et al.* 2005).

145

### 146 Construction of strain YJB9318

147 Plasmids and primers used in this study are listed in Table S1. YJB9318 is a derivative of strain  
148 RM1000 #2 (Table S1) in which one copy of *GAL1* was replaced with *URA3*  
149 (*GAL1/Δgal1::URA3*). First, the *URA3* marker was amplified from plasmid p1374 with primers  
150 1672 and 1673 (Table S1), and transformed into isolate YJB7617 (RM1000#2) replacing one  
151 copy of *GAL1* (YJB8742) (LEGRAND *et al.* 2008). Correct disruption of *GAL1* was confirmed by  
152 diagnostic PCR using primers 1674 and 1675 (Table S1). To make YJB9318 prototrophic, *HIS1*  
153 was reintroduced into strain YJB8742 by transforming with plasmid p1375 (pGEM-*HIS1*) that  
154 was cut with restriction enzyme *NruI*. Diagnostic PCR with primers 728 and 565 (Table S1)  
155 confirmed correct integration of *HIS1* at its native locus. To ensure that transformation did not  
156 cause any genomic changes to the parental strain, single nucleotide polymorphism (SNP)  
157 microarrays and SNP/Comparative genome hybridization arrays (SNP/CGH) were performed as

158 described previously (data not shown) (SELMECKI *et al.* 2005; FORCHE *et al.* 2009a; ABBEY *et al.*  
159 2011).

#### 160 *PCR conditions for transformation and diagnostic PCR*

161 PCRs for transformation were performed in a total volume of 50  $\mu$ l with 10 mM Tris-HCl (pH  
162 8.0), 50 mM KCl, 1.5 mM MgCl<sub>2</sub>, 200  $\mu$ M each dATP, dCTP, dGTP, and dTTP, 2.5 U rTaq  
163 polymerase (TAKARA), 4  $\mu$ l of 10  $\mu$ M stock solution of each primer, and 1.0  $\mu$ l of template  
164 (p1374). PCRs were carried out for 34 cycles as followed: initial denaturation step for 5 min at  
165 94°C, denaturation step for 1 min at 94°C, primer annealing step for 30 s at 55°C, extension  
166 step for 1 min at 72°C, and a final extension step for 10 min at 72°C. Each PCR product was  
167 checked by gel electrophoresis for the amplification of the desired PCR fragment. PCR products  
168 were purified using ethanol precipitation.

169 Diagnostic PCR was performed in a final volume of 25  $\mu$ l with 10 mM Tris-HCl (pH 8.0),  
170 50 mM KCl, 1.5 mM MgCl<sub>2</sub>, 100  $\mu$ M each dATP, dCTP, dGTP, and dTTP, 2.5 U rTaq  
171 polymerase, 2  $\mu$ l of 10  $\mu$ M stock solution of each primer, and 2.5  $\mu$ l genomic DNA. PCRs were  
172 carried out for 30 cycles as followed: initial denaturation for 3 min at 94°C, denaturation step or  
173 1 min at 94°C, primer annealing step for 30 s at 55°C, extension step for 1 min at 72°C, and a  
174 final extension step for 5 min at 72°C. Five microliters of PCR product was run on a 1% agarose  
175 gel to verify that the fragment was of the appropriate size.

176

#### 177 *Model of oropharyngeal Candidiasis (OPC)*

178 The OPC model was essentially performed as described previously (SOLIS AND FILLER 2012).  
179 Briefly, male BALB/c mice (21-25 g; Taconic Farms) were immune-suppressed with cortisone  
180 acetate (225 mg/kg, Sigma) on days -1, 1, and 3 of infection. For inoculum preparation, strain  
181 YJB9318 was grown in MIN-Gal medium to ensure that no Gal<sup>-</sup> cells arose prior infection. A  
182 total of twenty mice were infected with  $1 \times 10^6$  cells of strain YJB9318 (Table1). Of these, 17  
183 mice survived to the scheduled dates of sacrifice. On days 1, 2, 3, and 5 post-infection (FIG.1,



184 FIG.S1), 4-5 mice were euthanized. The tongues were extracted, weighted, and homogenized.  
185 Next, appropriate dilutions were spread onto YPD agar plates for total CFU counts and onto  
186 2DOG agar plates to determine the number of Gal<sup>-</sup> cells. Recovered isolates were directly  
187 picked from the original YPD and 2DOG plates to 96well plates with 50% glycerol and stored at  
188 -80°C to avoid any changes to the isolates not acquired during *in vivo* passage.

189 To confirm the Gal status of recovered isolates, they were grown overnight in deep 96-  
190 well plates containing 300 µl YPD broth. Cultures were washed once with distilled water, 5 µl of  
191 each culture were spotted onto 150 x 100 mm YPD plates, MIN-Gal and 2DOG medium, and  
192 plates were incubated for 2 days at 30°C to assess growth. The frequency of LOH at the *GAL1*  
193 locus was determined using the ratio of total isolates recovered (CFUs on YPD) divided by the  
194 total number of 2DOG<sup>R</sup> isolates. The *in vitro* frequency of *GAL1* loss in strain YJB9318 was  
195 measured as described previously (FORCHE *et al.* 2009).

196

#### 197 *Assessment of colony phenotypes (CPs) and selection of isolates for genotypic analysis*

198 Previously, we showed that isolates with missegregation events (whole Chr aneuploidy and  
199 whole Chr LOH) exhibited CPs consistent with slow growth and abnormal filamentous growth  
200 (FORCHE *et al.* 2005; FORCHE *et al.* 2009). To increase the ability to identify genotypic changes,  
201 we plated all isolates for CPs on YPD at 30°C and scored single colonies after 3 days. CPs  
202 were determined for colony diameter (smaller or larger than parental strain, first number) and  
203 filamentous growth (degree of wrinkling compared to parental strain, second number) resulting  
204 in a binary code for each of the 7 unique CPs (see FIG.2D for representative images). For  
205 further genotypic analysis, all isolates with altered CPs (6 Gal<sup>+</sup> and 158 Gal<sup>-</sup>), and isolates with  
206 parental CP (148 Gal<sup>+</sup> and 116 Gal<sup>-</sup>) from a total of 17 mice were chosen to yield a set of 429  
207 isolates (FIG.S1, Table S2).

208

#### 209 *Determination of ploidy by flow cytometry*

210 Ploidy of all recovered isolates was determined as described previously (ABBEY *et al.* 2011).  
211 Briefly, each isolate was streaked out to single colony onto YPD plates and incubated for 3 days  
212 at 30°C. Single colonies were transferred to deep 96-well plates containing 0.6 ml of YPD and  
213 cultures were grown overnight (16 hrs) at 300 rpm to stationary phase. Fifty microliters were  
214 transferred to new deep 96-well plates containing 250 µl YPD broth, and cultures were grown  
215 for 6 hrs at 30°C at 300 rpm. Two hundred fifty microliters of culture was transferred to round  
216 bottom 96-well plates, cells were spun down at 1,000 rpm, and resuspended in 20 µl of 50:50  
217 buffer (50 mM Tris HCl, pH 8.0, 50 mM EDTA, pH 8.0). To fix cells, 180 µl of 95% ethanol was  
218 added to each well. Cells were treated with 0.1 µg/ml RNase (1 hr at 37°C) and 5 mg/ml  
219 Proteinase K (30 min at 37°C) followed by staining with SybrGreen for 1hr in the dark. After a  
220 final wash in 50:50 buffer, cells were resuspended in 50:50 buffer and run on a flow cytometer  
221 (FACSCALIBUR). A customized MATLAB script was used to calculate ploidy for each isolate  
222 using a diploid and a tetraploid isolate as controls (ABBEY *et al.* 2011).

223

224 *Whole genome karyotyping using double digest restriction site associated DNA sequencing*  
225 *(ddRADseq)*

226 ddRADseq was carried out using the restriction enzymes *Mfel* and *Mbol* (LUDLOW *et al.* 2013).  
227 For each lane of Illumina sequencing (up to 576 isolates/lane), raw read sequences were split  
228 into isolate-specific pools based on their associated 6 bp TruSeq multiplex and 4 bp inline  
229 barcode sequences, allowing 1 mismatch in the i7 barcodes and no mismatches in the inline  
230 barcodes. A minimum barcode quality of Phred = 20 was applied to all bases of the inline  
231 barcode. Reads were then aligned to the *C. albicans* reference (SC5314 v. A21-s02-m04-r01)  
232 using BWA (v.0.7.5) allowing 6 mismatches and quality trimming using the parameter -q 20. The  
233 SAMtools (v.0.1.17) (LI *et al.* 2009) mpileup command was then used to create a pileup file for  
234 each isolate, using the -q 20 and -C 50 parameters. From the pileup file, the count of all  
235 observed bases at each covered reference position was calculated.

236

237 Ploidy Estimation from ddRADseq

238 From the aligned-read SAM file, the position of the *Mfel* end of each read was determined (5'  
239 end of forward reads, 3' end of reverse reads). Only reads with a Phred-scaled mapping  
240 alignment quality of at least 20 were considered. The occurrence of each end position was then  
241 counted, resulting in a set of marker positions for each isolate along with the number of reads  
242 aligning to each of those positions. For all isolates in a sequencing run, a matrix of observed  
243 read counts at all positions was generated. Because of the long tail of infrequently observed  
244 sites, counts of 1 were treated as counts of zero. Only positions counted in at least one isolate  
245 were retained. The matrix of counts was then edited to remove any isolates with  $\geq 20\%$   
246 positions with 0 counts. Following this, marker positions were filtered to only include those  
247 occurring in  $>80\%$  of remaining isolates. The edited count matrix was used to calculate relative  
248 ploidy at each marker position as follows. Each isolate was normalized for depth of sequencing  
249 by dividing all observed counts by the median value of all counts  $> 0$ . To control for marker-to-  
250 marker variation in coverage (largely due to the size of the associated DNA fragment),  
251 normalized coverage at each marker in each isolate was divided by the median coverage  
252 (ignoring zero values) of that marker across a set of control euploid isolates. Before plotting,  
253 globally noisy markers, with standard deviations  $>0.5$  across all isolates (not including zero  
254 values), were removed and for each isolate a minimum raw count coverage of 10 or 20 was  
255 required at each position to remove low-confidence estimates for that isolate.

256 Ploidy was also assessed on a by-Chr basis. The unedited, original counts matrix was  
257 used to calculate the proportion of all reads in each isolate aligning to each Chr. The value for  
258 each Chr was then normalized by dividing the median value for that Chr across the set of  
259 euploid control isolates. To account for variation in genome size in aneuploids, values for each  
260 isolate were then further normalized by dividing each Chr value by the median Chr value for that  
261 isolate. For euploid isolates this should produce values of  $\sim 1$  across all Chr. A diploid with one

262 trisomic Chr would have a value of ~1.5 for one Chr and 1 for the rest. On the assumption that  
263 most isolates are essentially diploid, values were converted into ploidy by multiplying by 2, 3 or  
264 4 in the small number of isolates where this produced Chr copy number values closer to whole  
265 numbers.

266

### 267 Estimation of Allele Ratios

268 Heterozygosity was assessed at all heterozygous sites in parental strain SC5314 (MUZZEY *et al.*  
269 2013) ignoring indels. For each Chr, SC5314 heterozygous sites were identified by aligning the  
270 two phased haplotypes (“A” and “B”) from (MUZZEY *et al.* 2013) using the Mummer (v3.22)  
271 nucmer command with the parameters -c 100 -l 10 -b 200. Alignments were filtered using the  
272 delta-filter command with the -g parameter and snps were then called using the show-snps  
273 command with the parameters -r -C -H -T. the counts of the two expected alleles were  
274 extracted from the count of all observed alleles (as above) in each isolate for every expected het  
275 site covered by reads. The binomial probability of the observed counts was then calculated  
276 using models 1A:0B (homozygous A), 3A:1B, 2A:1B, 1A:1B, 1A:2B, 1A:3B and 0A:1B  
277 (homozygous B). For example for model 3A:1B the binomial probability of the observed data  
278 would be calculated based on  $P(A) = 0.75$ ,  $P(B) = 0.25$ . For the homozygous models, observed  
279 counts of the “wrong” allele were assumed to be errors with a probability of 0.01, with the  
280 expected allele having a probability of 0.99. For each site, the set of possible models was then  
281 consolidated based on the copy number of the Chr, identified from the whole Chr read  
282 proportion analysis above. For disomic Chrs, models 1A:0B, 1A:1B and 0A:1B were compared  
283 and the best and second best models identified. For trisomic Chrs, the best and second best  
284 models were identified from models 1A:0B, 2A:1B, 1A:2B and 0A:1B. For tetrasomes, the  
285 models compared were 1A:0B, 3A:1B, 1A:1B, 1A:3B and 0A:1B. After identification of the best  
286 model, for each site in each isolate a LOD score ( $\text{Log}_{10} P(\text{Best Model})/P(\text{Second Best Model})$ )  
287 was then calculated. For each dataset, markers were removed unless they were classified as

288 heterozygous (best model = 1A:1B with LOD > 1) in at least one isolate. For visualization, a  
289 median sliding window of size 7 was applied to the best model values, ordered by genome  
290 position.

291

### 292 *Population frequency of changes*

293 To obtain estimates of the population frequency of CPs and genotypic changes (i.e., not just for  
294 the analyzed isolates), we calculated the frequencies of phenotypic and genotypic changes for  
295 Gal<sup>+</sup> and Gal<sup>-</sup> isolates based on the total number of *C. albicans* CFUs from the experiment  
296 ( $8.52 \times 10^5$ ), the number of Gal<sup>+</sup> isolates ( $8.51 \times 10^5$ ; 99.89% of the total), and the number of  
297 Gal<sup>-</sup> cells ( $9.1 \times 10^2$ ; 0.11%). Extrapolation showed that the frequency of Gal<sup>+</sup>+ CP in the total  
298 population was  $3.9 \times 10^{-2}$  (~1/400 cells) and  $\sim 5.8 \times 10^{-4}$  for Gal<sup>-</sup>+CP (~6/10,000 cells) (FIG.S1).  
299 The frequency of genotypic changes (Chr1 changes excluded) for Gal<sup>+</sup> cells was  $13 \times 10^{-2}$  and  
300  $5.2 \times 10^{-4}$  for Gal<sup>-</sup> cells. (FIG.S1).

301 A customized MATLAB script was written to calculate the total likelihood for all the  
302 permutations for each number of genotypic changes. A chi square goodness-of-fit test was  
303 applied to ask whether the difference between the expected and observed numbers was due to  
304 sampling variation, or whether it was a real difference. A p-value of  $\leq 0.05$  was considered  
305 significant.

306

### 307 *Diversity index*

308 ddRADseq data was used to determine the number of unique karyotypes that were present in  
309 each mouse and the number of colonies that exhibited each karyotype. A karyotype was  
310 considered unique if there was either a unique whole or partial Chr aneuploidy or LOH event  
311 and/or there was variation in the LOH breakpoint, compared to other colonies isolated from the  
312 same mouse. Diversity was then calculated as Simpsons index ( $1 - \sum p_i^2$ ) (SIMPSON 1949), where

313  $p_i$  is the proportional abundance of each colony type (note that if there is only one karyotype,  
314 diversity is 0).

315

## 316 **Results**

317 To analyze diversification rates of *C. albicans* on a mucosal surface, we seeded the oral cavity  
318 of 20 corticosteroid-treated mice with  $10^6$  cells originating from YJB9318, a single, colony-  
319 purified *C. albicans* strain that was heterozygous for *GAL1* (GORMAN *et al.* 1992). Groups of 4-5  
320 mice were sacrificed on days 1, 2, 3 and 5 and isolates were recovered from tongue  
321 homogenates (FIG. 1 and S1). Initiating the experiment with a Gal<sup>+</sup>/<sup>-</sup> strain enabled us to  
322 acquire evolved isolates from both YPD plates (Gal<sup>+</sup>, 541 colony isolates, no selection, unknown  
323 genomic changes) and 2-deoxygalactose (2DOG) plates (Gal<sup>-</sup>, 360 colony isolates, minimum  
324 genomic change of LOH at the *GAL1* locus) (FIG. 2A and S1). All recovered isolates were first  
325 screened for changes in colony phenotype (CPs) and we identified 7 distinct CPs, 3 of them  
326 were also detected among Gal<sup>+</sup> isolates and all 7 were detected among Gal<sup>-</sup> isolates (FIG.S1,  
327 Fig.2, and see below). As measured by flow cytometry, the majority (72%) of isolates retained a  
328 diploid genome content (FIG. 2B). Strikingly, eleven isolates had haploid or near-haploid  
329 genome (2%) content. An additional seven isolates were tetraploid or near-tetraploid while the  
330 remainder (26%) had ploidy values consistent with aneuploid diploids (Table S2).

331

332 Twenty-four hours after infection, the oral fungal burden was approximately  $10^2$  CFUs  
333 per g tissue, suggesting that only a small proportion of the starting inoculum initiated the oral  
334 infections (FIG. 2A). The number of CFUs generally increased with time of infection and the  
335 proportion with CPs increased slightly (Table 1). The proportion of Gal<sup>-</sup> CFU increased  
336 proportional with the total CFU (measured by comparing the frequency of 2DOG<sup>R</sup> isolates and  
337 YPD isolates). The overall frequency of LOH at *GAL1* was two orders of magnitude higher *in*

338 *vivo* compared to *in vitro* (FIG.2A, S2). Ploidy changes were much more prevalent in the  
339 isolates selected for *GAL1* LOH (FIG. 2B) compared to isolates from YPD and non-diploid  
340 isolates were frequently associated with reductions in both colony size and filamentous growth  
341 (FIG. 2D).

342

### 343 **Genotypic diversity by RADSeq**

344 ddRADseq analysis was used to analyze Chr copy number and allele frequencies from  
345 154 isolates off YPD and 275 isolates off 2DOG. The overall diversity was calculated using  
346 Simpsons index of diversity (1-D) (see methods) for each mouse. The within-mouse diversity  
347 was variable at day 1 and remained high thereafter (FIG. 2C). This suggests that diversity was  
348 generated early after infection and was not highly deleterious to survival and growth within the  
349 host.

350 We then clone-corrected the data set based upon the assumption that isolates with  
351 identical genotype and CP from the same mouse were likely to be daughter isolates resulting  
352 from a single mutational event. When the same event (genomic change) was found in different  
353 mice, we expect that event was either frequent and/or subject to strong selective pressure in the  
354 mice and was termed a 'recurrent' event.

355 Isolates that underwent ploidy shifts based on flow cytometry were re-analyzed by  
356 ddRADseq. Interestingly, euploid shifts (the loss or gain of complete sets of Chrs) were  
357 extremely rare; only three (of 10 confirmed) haploids and none of the 7 confirmed triploids or  
358 tetraploids were euploid (FIG. 3A and B). By contrast, trisomy was detected for every Chr, with  
359 higher trisomic frequencies for smaller Chrs and ChrR (FIG.4A and B) (Table 2, S3). There were  
360 seven isolates in which the majority of Chrs (>4) were non-disomic or where Chrs were present  
361 in multiple ploidy levels (e.g. monosomy, disomy and trisomy within the same isolate), providing  
362 indirect evidence that euploid shifts likely preceded subsequent Chr missegregation events

363 (FIG.3C) (FORCHE *et al.* 2008; HARRISON *et al.* 2014; HICKMAN *et al.* 2015). Importantly,  
364 aneuploidy was detected in both Gal<sup>+</sup> and Gal<sup>-</sup> isolates (FIG.S3).

365 Haploids were detected using flow cytometry optimized after detection of an initial  
366 haploid isolate from *in vitro* studies (HICKMAN *et al.* 2013). The detection of multiple haploid  
367 isolates (10/950 2DOG<sup>R</sup> isolates recovered initially from the mouse oral cavity) was unexpected  
368 and exciting. Of note, only three haploids were perfectly euploid, with 7 being near-haploid; all  
369 the haploids tested were relatively unstable and readily converted to the autodiploid state  
370 (HICKMAN *et al.* 2015), and data not shown), suggesting additional haploids may have been  
371 present *in vivo*. We identified nine distinct haploid or near-haploid genotypes that were  
372 recovered from 6 different mice: 3 single haploids from 3 different mice (Fig.3B), 2 unique  
373 haploids from one mouse (D3M2), 3 distinct haploids from one host (D5M5), and 2 identical  
374 haploids (different CPs but treated as likely clones, D3M1) from one mouse (Table S2).  
375 Interestingly, only 3 genotypes were identical between Hickman *et al.* (HICKMAN *et al.* 2013) and  
376 this study, which suggests that the original isolates were a mixed population (supported by  
377 mixed flow cytometry profiles, data not shown) although the instability of haploids may have  
378 contributed as well.

379 Whole Chr LOH was detected for all Chrs, with higher frequencies seen for the larger  
380 Chrs (ChrR, 1-3) (Fig.4C, Fig.S4) (Table 2, S3). The frequency of missegregation events is not  
381 entirely a function of Chr size, however, as the frequency of events on Chr3 (1.8 Mb), was  
382 higher than either Chrs 2 (2.1 Mb) or ChrR (2.3 Mb), which are 2.1 and 2.3 Mb, respectively. Of  
383 note, whole Chr LOH of Chrs 2, 4, 6, and 7, was biased towards allele A, consistent with the  
384 failure to detect homozygous allele B in haploids or other isolates (FORCHE *et al.* 2008; HICKMAN  
385 *et al.* 2013; FORD *et al.* 2015; HICKMAN *et al.* 2015; HIRAKAWA *et al.* 2015; HIRAKAWA *et al.*  
386 2017). This suggests that the B alleles of these Chrs harbor lethal recessive alleles (FERI *et al.*  
387 2016) and therefore cannot be entirely lost. We did identify isolates with segmental LOH  
388 towards allele B for Chrs2, 4, and 6 (FIG.5A).



389

## 390 **GAL1 LOH event characterization**

391         The isolate collection illuminates the diversity of molecular mechanisms that can yield a  
392 Gal<sup>-</sup> phenotype due to loss of the functional allele of *GAL1* from the B haplotype of Chr1  
393 (Fig.5B). We classified 264 *GAL1* LOH events as either due to missegregation, (involving loss of  
394 the entire B Chr) or recombination (involving LOH across the subsection of Chr1L  
395 encompassing *GAL1*). Recombination was more frequent than missegregation (67% vs. 33% of  
396 the total events respectively) consistent with aneuploidy of large Chrs as rare or deleterious  
397 (Fig.5C) (Table S3). Among the Chr1 missegregation events, only the ten A-haplotype  
398 monosomies can be explained by a single step process: non-disjunction of the B copy of Chr1  
399 during mitosis, leading to progeny with a single copy of the A homolog. The remaining  
400 aneuploids underwent at least two molecular events, either an increase in the copy number of  
401 the A version of Chr1 by missegregation, followed by loss of the B homolog, or vice-versa.  
402 Missegregation events were much more frequent than recombination on all other Chrs, with  
403 whole Chr aneuploidy more frequent on smaller Chrs (Chr5-7) and whole Chr LOH more  
404 prevalent on larger Chrs (Chr1-4, R) (Fig.5C).

405         Recombination events were categorized as: 1) LOH covering a Chr arm from the  
406 recombination initiation site through the telomere (likely break induced replication, BIR); 2)  
407 shorter-range LOH resulting from two crossover events that do not reach the telomere (double  
408 crossovers or gene conversions, GC); and 3) segmental copy number variations (CNVs) which  
409 includes truncations, amplifications and deletions. Recombination events on Chr1L were  
410 dominated by BIR (94%), with GC events implicated in the remainder (6%, Fig.5B and 6). Rare  
411 recombination events also were detected on all other Chrs in a few Gal<sup>+</sup> as well as in Gal<sup>-</sup>  
412 isolates and BIR was far more frequent than GC (Fig.5A and 6).

413         The sites of recombination across Chr1L appeared relatively randomly distributed  
414 between *GAL1* and *CEN1* (Fig.5B). Four potential hot spot regions were identified by binning

415 Chr1L breakpoints every 50 kb along Chr1L (Fig.S5): two to the right of the *GAL1* (at ~450 kb)  
416 locus (451-500 kb and 501-550 kb), one between 701-750 kb and the last one between 851-900  
417 kb (Fig.S5, Table S4). Most of these break regions were not near any genome elements known  
418 to promote double strand breaks such as transposable elements.

419 In addition to the missegregation and recombination patterns described above, a small  
420 number of complex rearrangements were also detected. These included Chr truncations and  
421 recombination events that involved segmental aneuploidies and could only arise through  
422 multiple sequential events on a single Chr (Fig.6). Complex events were only seen following  
423 2DOG selection and were most frequent on Chr1 (Fig.6) (see Table S4 for break coordinates).  
424 In addition, several isolates had multiple crossover events on Chr1, some of them involving both  
425 Chr arms with LOH to AA and BB alleles at different positions (Fig.6). Taken together, these  
426 complex genotypes suggest that double-strand breaks (DSBs) were repaired via multiple,  
427 distinct mechanisms (see discussion).

428

#### 429 **Recurrent events**

430 The finding that the same genomic changes appeared in multiple mice supports the idea  
431 that these are general responses of the genome to conditions encountered in the oral cavity  
432 during early stages of infection. Many missegregation events occurred in multiple mice (Fig.7,  
433 S6, Table S5). Homozygosis of Chr1 to the AA genotype was seen in every mouse following  
434 2DOG selection, presumably because this is an efficient mechanism for *GAL1* LOH (Fig.4).  
435 Other recurrent whole Chr events, such as trisomy of Chr6, which appeared in the Gal<sup>+</sup> isolates  
436 as well (Fig.S6), was unexpected. Uniparental disomy of Chr3 and Chr5 trisomy were also  
437 prevalent. Whether these different missegregation events are advantageous during early  
438 infection or during the transition into and out of the host, remains to be determined.

439

#### 440 **Hypervariability in evolved isolates**

441 Multiple combinatorial (i.e, recombination + missegregation) events were most frequent  
442 in Gal<sup>-</sup> isolates that also exhibit CPs (Fig.8A). Not surprisingly, multiple missegregation events  
443 were found together much more frequently than multiple recombination events—likely because  
444 aneuploidies and LOH arise during concerted Chr loss from tetraploid intermediates (FORCHE *et*  
445 *al.* 2008; HICKMAN *et al.* 2015). Recombination events were less prevalent in general and  
446 correspondingly the frequency of multiple recombination events was also much smaller.

447 We previously found that tetraploid isolates that underwent Chr loss yielded progeny  
448 with evidence of mitotic recombination that tended to involve multiple events on different Chrs  
449 (FORCHE *et al.* 2008). Combined with our observations of multiple and/or complex changes per  
450 isolate (Fig.5A and B, Fig.6), this suggests that once an isolate has undergone one mutational  
451 change it has an increased likelihood of additional changes. To quantitatively explore this idea,  
452 we calculated the frequencies of multiple vs. single events detected in the *in vivo* and *in vitro*  
453 samples (data not shown), as well as the frequency expected if each event arose randomly. The  
454 frequency of events was significantly greater than random for  $\geq 5$  changes per isolate for any  
455 genome change *in vivo* but not *in vitro* (only  $\geq 7$  changes was significant) (FIG.8B and C, Table  
456 S4), indicating that in the isolates studied, highly diverse isolates are overrepresented. This  
457 implies that rare individuals undergo high levels of recombination that involve multiple Chrs.

458

## 459 **Discussion**

460 To understand the evolutionary forces responsible for genomic rearrangements leading  
461 to fitter genotypes, one must first identify the types of changes that reshape the genome  
462 (CHADHA AND SHARMA 2014). Here, we provide the first population-level study of the standing  
463 variation that arises in *C. albicans* during oropharyngeal candidiasis by analyzing several  
464 hundred isolates recovered from 17 mice at different time points during the infection.  
465 Importantly, this study design provided the perspective of time within the host. Flow cytometry  
466 and ddRADseq of 429 isolates detected many types of events due to missegregation,

467 recombination and multiple events of both types. Our observations of missegregation and DSB-  
468 associated changes are consistent with two recent studies of genotypic and phenotypic intra-  
469 species variation and the evolution of drug resistance in single isolates of clinical *C. albicans*  
470 isolates (FORD *et al.* 2015; HIRAKAWA *et al.* 2015). While previous studies provide an important  
471 snapshot of ongoing changes in human infections, the lack of multiple isolates per time point  
472 makes it very difficult to recapitulate isolate genealogies throughout evolution. Of note, diversity  
473 was detectable even one day post infection, suggesting that either changes arise rapidly upon  
474 the shift in growth conditions from liquid medium to the mouse and back (JACOBSEN *et al.* 2008)  
475 or that exposure to the host environment for only 24 h of infection is sufficient to induce  
476 genotypic changes.

477         The detection of multiple independent haploid or near-haploid isolates with different  
478 genotypes was surprising, suggesting that haploidization repeatedly occurs in the oral cavity.  
479 We previously found Chr missegregation in isolates recovered after passage in a systemic  
480 model of infection and after *in vitro* exposure to physiologically relevant stressors (FORCHE *et al.*  
481 2011). *In vitro*, the length of LOH tracts (short, long, whole Chr) was associated with the type  
482 and severity of stress applied. Here, all three types of LOH arose at appreciable frequencies  
483 along with high levels of aneuploidy, supporting the idea that *C. albicans* is exposed to  
484 significant combinatorial stress in the oral cavity even though it appears to flourish in the oral  
485 cavity during oropharyngeal candidiasis.

486         We detected a positive correlation between specific CPs and Chr missegregation. A  
487 large proportion of CPs were small in diameter and had completely smooth or less wrinkly  
488 colonies (Fig.2C), suggesting that they grow less well than the parental strain under the  
489 conditions tested and have defects in filamentous growth. This is reminiscent of the slow growth  
490 seen for aneuploidy *Saccharomyces cerevisiae* isolates grown in lab media (TORRES *et al.*  
491 2007; THORBURN *et al.* 2013), which is thought to be the result of unbalanced protein  
492 stoichiometry, difficulty segregating aneuploidy Chrs or higher demands for DNA replication

493 (STORCHOVA *et al.* 2006; TORRES *et al.* 2008; PAVELKA *et al.* 2010; TORRES *et al.* 2010; BENNETT  
494 *et al.* 2014; HIRAKAWA *et al.* 2015).

495 Mutants with filamentation defects cause less damage to epithelial and endothelial cells  
496 *in vitro* (PHAN *et al.* 2000; TSUCHIMORI *et al.* 2000; BENSEN *et al.* 2002). This suggests that the  
497 isolates with reduced filamentous growth may not express hyphal-specific genes (e.g., *ALS3*,  
498 *SAP4* and *SAP6*) and/or may not be recognized as readily by the host immune cells. The  
499 majority of isolates with small CM acquired whole Chr aneuploidy, supporting the idea that these  
500 isolates may grow slowly under standard lab conditions, yet might have an advantage *in vivo*  
501 (SEM *et al.* 2016). Interestingly, a subset of isolates recovered after a systemic infection in mice  
502 also exhibited aneuploidy and LOH (FORCHE *et al.* 2009a).

503 Chr6 trisomy was much more frequent than other aneuploidies, and Chr6ABB was twice  
504 as frequent as Chr6AAB. Chr6 harbors multiple members of important virulence gene families,  
505 such as secreted aspartic proteases, lipases and adhesins (HUBE *et al.* 2000; NAGLIK *et al.*  
506 2004; SCHALLER *et al.* 2005; HOYER *et al.* 2008; DJORDJEVIC 2010), the *NAG* gene cluster  
507 important for alternative carbon utilization (KUMAR *et al.* 2000) and *RAD52*, a gene important for  
508 DSB repair (CIUDAD *et al.* 2004; CIUDAD *et al.* 2005). Interestingly, overexpression of Rad52  
509 increased genome instability (TAKAGI *et al.* 2008). Therefore, an extra copy of *RAD52* could  
510 potentially lead to increased genome instability and amplification of specific advantageous  
511 alleles (e.g. one extra copy of allele A) could promote adaption to specific environments such as  
512 the oral cavity. Follow-up experiments will test the effect of Chr6 trisomy on survival,  
513 persistence, and virulence of *C. albicans* in the oral cavity.

514 DSBs arise from endogenous sources including reactive oxygen species (e.g., produced  
515 by immune cells), collapsed replication forks, and from exogenous sources including chemicals  
516 that directly or indirectly damage DNA (SHRIVASTAV *et al.* 2007). The utilization of the *GAL1*  
517 selection system not only allowed us to identify the major classes of genome changes and to  
518 catalogue the types of LOH events that resulted in a Gal<sup>-</sup> phenotype, but it also enabled us to

519 make hypotheses about the types of mechanisms that are involved in DSB repair. While the  
520 majority of LOH was likely the result of BIR with or without crossover, more complex LOH  
521 events also arose in a subset of isolates (see Fig.5C). The LOH signatures on Chr1 are  
522 consistent with what would be observed after short and long patch mismatch repair using  
523 different alleles as repair templates (COÏC *et al.* 2000; MARTINI *et al.* 2011; BOWEN *et al.* 2013).  
524 Furthermore, more than one mismatch machinery may have been involved in repairing breaks.  
525 Strikingly, similar LOH signatures were observed during mitotic DSB repair in *S. cerevisiae*  
526 (GUO *et al.* 2017; HUM AND JINKS-ROBERTSON 2017), suggesting that these mechanisms may  
527 have been conserved through evolution.

528 Whether genotypic variation arises through the parasexual cycle or via mitotic defects  
529 followed by Chr missegregation accompanied by recombination events remains an outstanding  
530 question. Our previous analysis of parasexual progeny showed that the majority of them were  
531 aneuploid, that Chr missegregation predominated, that changes were observed for multiple  
532 Chrs and that several isolates had short recombination tracts on multiple Chrs (FORCHE *et al.*  
533 2008). A more recent study examined 32 parasexual progeny generated *in vitro* for a wide  
534 range of virulence-associated traits and showed that parasexual mating can generate  
535 phenotypic diversity *de novo*, and has important consequences for virulence and drug  
536 resistance (HIRAKAWA *et al.* 2017) Direct evidence for the parasexual cycle *in vivo*, however,  
537 remains elusive and the mechanism of mitotic failure followed by Chr loss events cannot be  
538 ruled out (HARRISON *et al.* 2014).

539 Importantly, here we identified a substantial level of highly variable isolates, higher than  
540 what one would expect by random chance alone. We hypothesize that hypervariable  
541 subpopulations may be present in many natural populations, and that this diversity can enable  
542 rapid adaptation in time of stress or environmental stochasticity. Whether the observed changes  
543 are beneficial, detrimental or neutral remains to be determined, and is likely to be specific to the  
544 particulars of the environment. The link between how specific genotypic changes affects

545 survival, persistence, and the virulence potential of *C. albicans*, and whether the host  
546 recognizes and responds to this variation remains to be discovered.

547

## 548 **ACKNOWLEDGEMENTS**

549 We thank Carter Meyers for assistance with the animal studies and Darren Abbey for the  
550 Matlab script to determine likelihood for all permutations for each number of genotypic changes.  
551 AMD, GC, EJ and AF were funded by NIH grant R15 AI090633 to AF. SGF was funded by NIH  
552 grant R01DE022600 and JB was funded by an European Research Council Advanced Award  
553 340087 (RAPLODAPT). ACG was supported by a CIHR Banting Postdoctoral Fellowship.

554

555

## 556 **Figure Legends**

557 FIG.1. Experimental overview of *in vivo* and *in vitro* experiments.

558

559 FIG.2. Genotypic and phenotypic diversity arises early during oral infection. **A.** CPs arise later in  
560 the Gal<sup>+</sup> group (day 2, left graph) compared to the Gal<sup>-</sup> group (day 1, right graph) but are not  
561 observed *in vitro*. **B.** Ploidy changes (as measured by flow cytometry) do not arise in the Gal<sup>+</sup>  
562 group, but do so in the Gal<sup>-</sup> group with ploidy shifts observed as early as day 1 post infection. **C.**  
563 Simpson's D is high on average and depends strongly on composition of populations within  
564 mice (Gal<sup>+</sup>/Gal<sup>-</sup> ration of isolates) left, overall Simpson's D; right, Simpson's D by days spent in  
565 mice **D.** Bubble plot shows the number of haploid, diploid or aneuploid isolates (as measure by  
566 flow cytometry) that exhibit indicated CPs determined by growth on YPD at 30°C for 3 days. CP  
567 binary codes are shown in parenthesis (see also Table S2). Bubble size reflects the number of  
568 isolates. Circles, total CFUs, green triangles, CPs.

569

570 FIG.3. Whole genome ploidy shifts are rare.

571 **A.** Shown is the ddRADseq whole genome karyotype for parental strain YJB9318. Allele status  
572 is indicated on the top. Bottom half of figure provides copy number for each Chr relative to  
573 diploid parent (1 = 2 copies) Chrs are colored in light grey and black to indicate start/end of  
574 each Chr. Color-coding is used throughout for indicated genotypes. Each dot on the lower part  
575 (copy number) is a copy number estimate for a restriction fragment based on the reads aligning  
576 to one end of the restriction fragment. The dots on the upper part (allele status) are maximum  
577 likelihood estimates of allele ratios at each (sequenced) known SNP site, constrained by the Chr  
578 or segment copy number and smoothed across x number of adjacent sites (see also methods).  
579 The colors for the allele status provide exact genotype for each Chr. Note: This strain  
580 background (RM1000 #2) has a preexisting Chr2L allele A homozygosis and a crossover on  
581 ChrR occurred during generation of the parental strain that was unmasked in isolates that  
582 became homozygous (see red arrow). In the case of whole Chr LOH, the genotype at the  
583 centromere was called (see black arrows). Gaps in allele coverage on Chrs3, 7, and R are due  
584 to lack of heterozygosity in the reference strain SC5314 used for analysis (FORCHE *et al.* 2004;  
585 VAN HET HOOG *et al.* 2007; BUTLER *et al.* 2009). **B.** Haploids and near haploids exhibit different  
586 genotypes, \*(strain names in parenthesis from Hickman *et al.* 2013), y-axis, Chr copy number,  
587 x-axis, Chrs are ordered Chr1-7, and R. **C.** Isolates with > 2 ploidies/genome suggestive of  
588 ploidy shifts in progress.

589  
590 FIG.4. Overview of missegregation events across Chrs. **A.** Whole Chr aneuploidies include  
591 trisomies and tetrasomies. The number of disomic Chrs from haploids and near haploids is  
592 shown in parentheses. Y-axis: normalized copy number relative to diploid parent. Aneuploid  
593 Chrs are boxed in. Note: Images show single whole Chr aneuploidies for clarity; most isolates  
594 carry more than one whole Chr aneuploidy. **B.** Single and double aneuploidies are detected  
595 both for Gal<sup>+</sup> and Gal<sup>-</sup> isolates. Shown is number of isolates with 1 aneuploidy and 2  
596 aneuploidies that were acquired *in vivo*. Chrs are shown from Chr1, Chr2-7, and R. **C.** Whole



597 Chr LOH more frequently occurs on larger Chrs 1-3, and R in Gal<sup>-</sup> isolates. Combinations of  
598 whole Chr LOH were not observed in Gal<sup>+</sup> isolates.

599

600 FIG.5. Recombination and missegregation events.

601 **A.** Crossover-associated events most often lead to *GAL1* loss *in vivo*. **B.** Location of LOH  
602 breakpoints along Chr1. **C.** LOH breakpoints for Chr2-7, and R. Top horizontal black lines  
603 represent the two homologs; black oval represents centromeres, arrows show location of the  
604 major repeat sequence; Chr sizes are shown to the right of each Chr. The number of isolates for  
605 each genotype are indicated at the left; for Chr1 the numbers are in shades of yellow/brown,  
606 with higher numbers shaded darker; cyan, homozygous AA; magenta, homozygous BB; gray,  
607 heterozygous AB. Breakpoints were mapped in 25 kb bins. Exact start/end coordinates of break  
608 regions can be found in Table S4. Positions 1.6 - 2.8 Mb on Chr1 (indicated with 2 solid vertical  
609 black lines) are not shown due to lack of any LOH events across this region. XO, crossover,  
610 Maps are to scale.

611

612 FIG.6. Complex changes on individual Chrs include multiple recombination events on single  
613 Chrs (mostly Chr1), segmental deletions, truncations, and amplifications. For legend, please  
614 see Fig.5.

615

616 FIG.7. Recurrent missegregation events are frequent. Calculations were done for mice with *C.*  
617 *albicans* populations size  $\geq 12$  (9 of 17 mice); bubble sizes reflect the percent mice where the  
618 specific missegregation event (indicated on x-axis) was found. For example, whole Chr1 LOH  
619 allele AA and whole Chr6 trisomy were found in all 9 mice (100%). Y-axis, Chr1-7, and R; x-  
620 axis, missegregation genotypes.

621

622 FIG.8. Multiple changes (> 5) per isolate are significantly more frequent than what would be  
623 expected by random chance alone *in vivo* but not *in vitro* **A.** Multiple combinatorial  
624 (recombination (REC) + missegregation (MIS)) events are most frequent in Gal<sup>-</sup> with CPs.  
625 Percent of multiple event types for Gal<sup>+</sup> isolates (top left), Gal<sup>+</sup> plus CP (top right), Gal<sup>-</sup> (bottom  
626 left) and Gal<sup>-</sup> plus CP (bottom right). Y-axis, number of recombination events/isolate; x-axis,  
627 number of missegregation events per isolate. Bubble size represents the number of isolates  
628 with indicated combinations, e.g. number of isolates that have 1 recombination and 1  
629 missegregation event. Expected versus observed frequencies of changes *in vivo* (**B.**) and *in*  
630 *vitro* (**C.**). Significance is indicated by \*\* (p = 0.01).

631

### 632 **Supplemental Figures**

633 FIG.S1. Detailed experimental overview. This figure is an expansion of Fig.1 and includes  
634 detailed information about the total number of Gal<sup>+</sup> (YPD, no selection) and Gal<sup>-</sup> (2DOG,  
635 selection) isolates that were analyzed, that exhibit CPs, and genomic changes. Numbers are  
636 parsed by mouse and the time that isolates spent in the mouse (in days). In addition, this figure  
637 provides the actual total frequencies for CPs and genome changes determined by extrapolation  
638 from the total number of CFUs.

639

640 FIG.S2. The frequencies of *GAL1* LOH is 2 orders of magnitude higher *in vivo*. Each open circle  
641 represents one mouse (*in vivo*) or independent *in vitro* cultures (grown for 16 hrs).

642

643 FIG.S3. Single and double aneuploidies are detected for both Gal<sup>+</sup> (YPD, no selection) and Gal<sup>-</sup>  
644 (2DOG, selection) isolates. Shown are examples for isolates with 1 aneuploidy (1AN) and 2  
645 aneuploidies (2AN) that were acquired *in vivo*. Chrs are shown from Chr1, Chr2-7, and R, gray  
646 and black colors were used to show start and end of each Chr.

647

648 FIG.S4. Whole Chr LOH is more frequent for larger Chr1-3, and R. Shown are examples for  
649 whole Chr LOH either toward allele A or allele B and the number of isolates that acquired these  
650 specific genome changes. \* For Chrs4 and 7 no isolate with a single whole Chr LOH was  
651 observed. Chrs exhibiting whole Chr LOH are boxed.

652  
653 FIG.S5. Mapping of LOH breaks along Chr1L reveals 4 hotspot regions. Each of these regions  
654 contains between 15 and 22 breaks and is marked with a red arrow. Breaks were mapped in 25  
655 kb bins due to low resolution of ddRADseq. *CEN1*, centromere 1

656  
657 FIG.S6. Missegregation events are highly recurrent across mice.  
658 Shown are summaries for 9 mice with N > 12. Chrs are indicated on the y-axis. Mouse IDs are  
659 indicated across the top. For each mouse there are two columns of pie charts. The first column  
660 shows the number of Chrs that are 1N, 2N, 3N, and 4N with shades of brown going from light  
661 (1N) to dark (4N). The right column shows allele status (heterozygous (gray), allele A (cyan),  
662 allele B (magenta)).

663

664 Table 1. Frequency of colony morphology phenotypes.

| CM* | Total<br>N = 429 | Day1<br>N = 25 | Day2<br>N = 54 | Day3<br>N = 195 | Day5<br>N = 155 |
|-----|------------------|----------------|----------------|-----------------|-----------------|
| 00  | 0.62             | 0.8            | 0.74           | 0.66            | 0.49            |
| 01  | 0.03             | 0              | 0.04           | 0.04            | 0.02            |
| 02  | 0.03             | 0.04           | 0.04           | 0.02            | 0.05            |
| 03  | 0.01             | 0              | 0.00           | 0.02            | 0.01            |
| 10  | 0.06             | 0.04           | 0.07           | 0.04            | 0.10            |
| 11  | 0.07             | 0.04           | 0.02           | 0.05            | 0.12            |
| 12  | 0.14             | 0.08           | 0.06           | 0.12            | 0.21            |
| 13  | 0.01             | 0              | 0              | 0.02            | 0.01            |
| 20  | 0.02             | 0              | 0.04           | 0.04            | 0               |

665 \*Colony morphology, see Fig. 2D for representative images.

666

667 Table 2. Summary of missegregation events by Chr.

| Chromosome | Whole chromosome aneuploidy |    |    |    | Whole Chr LOH |    |    |
|------------|-----------------------------|----|----|----|---------------|----|----|
|            | Total                       | 1N | 3N | 4N | Total         | AA | BB |
| Chr1       | 18                          | 10 | 7  | 1  | 81            | 81 | 0  |
| Chr2       | 16                          | 10 | 6  | 0  | 28            | 18 | 10 |
| Chr3       | 11                          | 10 | 1  | 0  | 41            | 11 | 30 |
| Chr4       | 24                          | 9  | 12 | 3  | 8             | 8  | 0  |
| Chr5       | 34                          | 10 | 24 | 0  | 6             | 5  | 1  |
| Chr6       | 83                          | 5  | 72 | 6  | 4             | 4  | 0  |
| Chr7       | 19                          | 5  | 12 | 2  | 5             | 5  | 0  |
| ChrR       | 23                          | 10 | 13 | 0  | 22            | 15 | 7  |

668 Number (events) for each genotype are shown separately for whole Chr aneuploidy (1N,  
669 monosomic, 3N, trisomic, 4N, tetrasomic) and whole Chr LOH (AA, homozygous allele A, BB,  
670 homozygous allele B)

671

## 672 References

673 Abbey, D., M. Hickman, D. Gresham and J. Berman, 2011 High-Resolution SNP/CGH

674 Microarrays Reveal the Accumulation of Loss of Heterozygosity in Commonly Used  
675 *Candida albicans* Strains. *G3 (Bethesda)* 1: 523-530.

676 Bennett, R. J., A. Forche and J. Berman, 2014 Rapid mechanisms for generating genome  
677 diversity: whole ploidy shifts, aneuploidy, and loss of heterozygosity. *Cold Spring Harb*  
678 *Perspect Med* 4.

679 Bensen, E. S., S. G. Filler and J. Berman, 2002 A forkhead transcription factor is important for  
680 true hyphal as well as yeast morphogenesis in *Candida albicans*. *Eukaryot Cell* 1: 77-98.

681 Bowen, N., C. E. Smith, A. Srivatsan, S. Willcox, J. D. Griffith *et al.*, 2013 Reconstitution of long  
682 and short patch mismatch repair reactions using *Saccharomyces cerevisiae* proteins.

683 *Proceedings of the National Academy of Sciences of the United States of America* 110:

684 18472-18477.

- 685 Butler, G., M. D. Rasmussen, M. F. Lin, M. A. S. Santos, S. Sakthikumar *et al.*, 2009 Evolution  
686 of pathogenicity and sexual reproduction in eight *Candida* genomes. *Nature* 459: 657-  
687 662.
- 688 Calderone, R., 2012 *Candida and Candidiasis*. ASM, Washington, DC.
- 689 Chadha, S., and M. Sharma, 2014 Transposable elements as stress adaptive capacitors induce  
690 genomic instability in fungal pathogen *Magnaporthe oryzae*. *PLoS ONE* 9: e94415.
- 691 Ciudad, T., E. Andaluz, O. Steinberg-Neifach, N. F. Lue, N. A. Gow *et al.*, 2005 Homologous  
692 recombination in *Candida albicans*: role of CaRad52p in DNA repair, integration of linear  
693 DNA fragments and telomere length. *Mol Microbiol* 56: 1396.
- 694 Ciudad, T., E. Andaluz, O. Steinberg-Neifach, N. F. Lue, N. A. R. Gow *et al.*, 2004 Homologous  
695 recombination in *Candida albicans*: role of CaRad52p in DNA repair, integration of linear  
696 DNA fragments and telomere length. *Mol Microbiol* 53: 1177-1194.
- 697 Coïc, E., L. Gluck and F. Fabre, 2000 Evidence for short-patch mismatch repair in  
698 *Saccharomyces cerevisiae*. *The EMBO Journal* 19: 3408-3417.
- 699 Coyle, S., and E. Kroll, 2008 Starvation induces genomic rearrangements and starvation-  
700 resilient phenotypes in yeast. *Mol Biol Evol* 25: 310-318.
- 701 Demuyser, L., M. A. Jabra-Rizk and P. Van Dijck, 2014 Microbial cell surface proteins and  
702 secreted metabolites involved in multispecies biofilms. *Pathogens and Disease* 70: 219-  
703 230.
- 704 Djordjevic, J., 2010 Role of phospholipases in fungal fitness, pathogenicity and drug  
705 development- lessons from *Cryptococcus neoformans*. *Frontiers Microbiol* 1.
- 706 Fanning, S., W. Xu, N. Solis, C. A. Woolford, S. G. Filler *et al.*, 2012 Divergent Targets of  
707 *Candida albicans* Biofilm Regulator Bcr1 In Vitro and In Vivo. *Eukaryotic Cell* 11: 896-  
708 904.

- 709 Feri, A., R. Loll-Krippleber, P.-H. Commere, C. Maufrais, N. Sertour *et al.*, 2016 Analysis of  
710 Repair Mechanisms following an Induced Double-Strand Break Uncovers Recessive  
711 Deleterious Alleles in the *Candida albicans* Diploid Genome. *mBio* 7: e01109-01116.
- 712 Forche, A., D. Abbey, T. Pisithkul, M. A. Weinzierl, T. Ringstrom *et al.*, 2011 Stress alters rates  
713 and types of loss of heterozygosity in *Candida albicans*. *MBio* 2.
- 714 Forche, A., K. Alby, D. Schaefer, A. D. Johnson, J. Berman *et al.*, 2008 The parasexual cycle in  
715 *Candida albicans* provides an alternative pathway to meiosis for the formation of  
716 recombinant strains. *PLoS Biol* 6: e110.
- 717 Forche, A., P. Magee, B. Magee and G. May, 2004 Genome-wide single-nucleotide  
718 polymorphism map for *Candida albicans*. *Eukaryotic cell* 3: 705-714.
- 719 Forche, A., P. T. Magee, A. Selmecki, J. Berman and G. May, 2009 Evolution in *Candida*  
720 *albicans* populations during a single passage through a mouse host. *Genetics* 182: 799-  
721 811.
- 722 Forche, A., P. T. Magee, A. Selmecki, J. Berman and G. May, 2009a Evolution in *Candida*  
723 *albicans* populations during single passage through a mouse host. *Genetics* 182: 799-  
724 811.
- 725 Forche, A., G. May, J. Beckerman, S. Kauffman, J. Becker *et al.*, 2003 A system for studying  
726 genetic changes in *Candida albicans* during infection. *Fungal Genet Biol* 39: 38-50.
- 727 Forche, A., G. May and P. T. Magee, 2005 Demonstration of loss of heterozygosity by single-  
728 nucleotide polymorphism microarray analysis and alterations in strain morphology in  
729 *Candida albicans* strains during infection. *Eukaryot Cell* 4: 156-165.
- 730 Ford, C. B., J. M. Funt, D. Abbey, L. Issi, C. Guiducci *et al.*, 2015 The evolution of drug  
731 resistance in clinical isolates of *Candida albicans*. *Elife* 4: e00662.
- 732 Gerstein, A. C., M. S. Fu, L. Mukaremera, Z. Li, K. L. Ormerod *et al.*, 2015 Polyploid Titan Cells  
733 Produce Haploid and Aneuploid Progeny To Promote Stress Adaptation. *mBio* 6:  
734 e01340-01315.

- 735 Gorman, J. A., J. W. Gorman and Y. Koltin, 1992 Direct selection of galactokinase-negative  
736 mutants of *Candida albicans* using 2-deoxygalactose. *Curr Genet* 21: 203-206.
- 737 Guo, X., Y. F. Hum, K. Lehner and S. Jinks-Robertson, 2017 Regulation of hetDNA Length  
738 during Mitotic Double-Strand Break Repair in Yeast. *Molecular Cell* 67: 539-549.e534.
- 739 Harrison, B. D., J. Hashemi, M. Bibi, R. Pulver, D. Bavli *et al.*, 2014 A tetraploid intermediate  
740 precedes aneuploid formation in yeasts exposed to fluconazole. *PLoS Biol* 12:  
741 e1001815.
- 742 Hickman, M., G. Zeng, A. Forche, M. P. Hidakawa, D. Abbey *et al.*, 2013 The 'obligate diploid'  
743 *Candida albicans* forms mating-competent haploids. *Nature* 494: 55-59.
- 744 Hickman, M. A., C. Paulson, A. Dudley and J. Berman, 2015 Parasexual Ploidy Reduction  
745 Drives Population Heterogeneity Through Random and Transient Aneuploidy in *Candida*  
746 *albicans*. *Genetics* 200: 781-794.
- 747 Hidakawa, M. P., D. E. Chyou, D. Huang, A. R. Slan and R. J. Bennett, 2017 Parasex generates  
748 phenotypic diversity *de novo* and impacts drug resistance and virulence in *Candida*  
749 *albicans*. *Genetics* 207: 1195-1211.
- 750 Hidakawa, M. P., D. A. Martinez, S. Sakthikumar, M. Z. Anderson, A. Berlin *et al.*, 2015 Genetic  
751 and phenotypic intra-species variation in *Candida albicans*. *Genome Res* 25: 413-425.
- 752 Hoyer, L. L., C. B. Green, S. H. Oh and X. Zhao, 2008 Discovering the secrets of the *Candida*  
753 *albicans* agglutinin-like sequence (ALS) gene family-a sticky pursuit. *Med Mycol* 46: 1 -  
754 15.
- 755 Hube, B., F. Stehr, M. Bossenz, A. Mazur, M. Kretschmar *et al.*, 2000 Secreted lipases of  
756 *Candida albicans*: cloning, characterization and expression analysis of a new gene  
757 family with at least ten members. *Archives of Microbiology* 174: 362 - 374.
- 758 Hum, Y. F., and S. Jinks-Robertson, 2017 Mitotic gene conversion tracts associated with repair  
759 of a defined double-strand break in *Saccharomyces cerevisiae*. *Genetics* 207: 115-128.

- 760 Jacobsen, M. D., A. D. Duncan, J. Bain, E. M. Johnson, J. R. Naglik *et al.*, 2008 Mixed *Candida*  
761 *albicans* strain populations in colonized and infected mucosal tissues. FEMS Yeast  
762 Research 8: 1334-1338.
- 763 Jakubovics, N. S., 2015 Intermicrobial Interactions as a Driver for Community Composition and  
764 Stratification of Oral Biofilms. Journal of Molecular Biology 427: 3662-3675.
- 765 Kamai, Y., M. Kubota, T. Hosokawa, T. Fukuoka and S. G. Filler, 2001 New model of  
766 oropharyngeal candidiasis in mice. Antimicrob Agents Chemother 45: 3195-3197.
- 767 Kumar, M. J., M. S. Jamaluddin, K. Natarajan, D. Kaur and A. Datta, 2000 The inducible N-  
768 acetylglucosamine catabolic pathway gene cluster in *Candida albicans*: Discrete N-  
769 acetylglucosamine-inducible factors interact at the promoter of NAG1. Proceedings of  
770 the National Academy of Sciences of the United States of America 97: 14218-14223.
- 771 Legrand, M., A. Forche, A. Selmecki, C. Chan, D. T. Kirkpatrick *et al.*, 2008 Haplotype mapping  
772 of a diploid non-meiotic organism using existing and induced aneuploidies. PLoS Genet  
773 4: e1.
- 774 Li, H., B. Handsaker, A. Wysoker, T. Fennell, J. Ruan *et al.*, 2009 The Sequence  
775 Alignment/Map format and SAMtools. Bioinformatics 25: 2078-2079.
- 776 Lohberger, A., A. T. Coste and D. Sanglard, 2014 Distinct Roles of *Candida albicans* Drug  
777 Resistance Transcription Factors TAC1, MRR1, and UPC2 in Virulence. Eukaryotic Cell  
778 13: 127-142.
- 779 Lorenz, M. C., J. A. Bender and G. R. Fink, 2004 Transcriptional response of *Candida albicans*  
780 upon internalization by macrophages. Eukaryot Cell 3: 1076-1087.
- 781 Lu, C.-W., Y. Tao, X.-H. Li, Y. Dong and D.-D. Zhou, 2017 Fungal chorioretinitis with systemic  
782 candidiasis in an infant following treatment with broad spectrum antibiotics: A case  
783 report. Experimental and Therapeutic Medicine 14: 286-288.
- 784 Ludlow, C. L., A. C. Scott, G. A. Cromie, E. W. Jeffery, A. Sirr *et al.*, 2013 High-throughput  
785 tetrad analysis. Nat Meth PMID 23666411.



- 786 Lyon, J. P., S. C. da Costa, V. M. G. Totti, M. F. V. Munhoz and M. A. de Resende, 2006  
787 Predisposing conditions for *Candida* spp. carriage in the oral cavity of denture wearers  
788 and individuals with natural teeth. *Canadian Journal of Microbiology* 52: 462-467.
- 789 Malavia, D., L. E. Lehtovirta-Morley, O. Alamir, E. Weiß, N. A. R. Gow *et al.*, 2017 Zinc  
790 Limitation Induces a Hyper-Adherent Goliath Phenotype in *Candida albicans*. *Frontiers*  
791 in *Microbiology* 8.
- 792 Martini, E., V. Borde, M. Legendre, S. Audic, B. Regnault *et al.*, 2011 Genome-Wide Analysis of  
793 Heteroduplex DNA in Mismatch Repair–Deficient Yeast Cells Reveals Novel Properties  
794 of Meiotic Recombination Pathways. *PLoS Genetics* 7: e1002305.
- 795 Muzzey, D., K. Schwartz, J. Weissman and G. Sherlock, 2013 Assembly of a phased diploid  
796 *Candida albicans* genome facilitates allele-specific measurements and provides a simple  
797 model for repeat and indel structure. *Genome Biol* 14: R97.
- 798 Naglik, J., A. Albrecht, O. Bader and B. Hube, 2004 *Candida albicans* proteinases and  
799 host/pathogen interactions. *Cell Microbiol* 6: 915 - 926.
- 800 Naglik, J. R., S. J. Challacombe and B. Hube, 2003 *Candida albicans* secreted aspartyl  
801 proteinases in virulence and pathogenesis. *Microbiol Mol Biol Rev* 67: 400-428.
- 802 Nobile, C. J., D. R. Andes, J. E. Nett, F. J. Smith, F. Yue *et al.*, 2006 Critical role of Bcr1-  
803 dependent adhesins in *C. albicans* biofilm formation *in vitro* and *in vivo*. *PLoS Pathog* 2:  
804 e63.
- 805 Pande, K., C. Chen and S. M. Noble, 2013 Passage through the mammalian gut triggers a  
806 phenotypic switch that promotes *Candida albicans* commensalism. *Nat Genet* advance  
807 online publication.
- 808 Pankhurst, C. L., 2013 Candidiasis (oropharyngeal). *BMJ Clinical Evidence* 2013: 1304.
- 809 Park, H., Y. Liu, N. Solis, J. Spotkov, J. Hamaker *et al.*, 2009 Transcriptional Responses of  
810 *Candida albicans* to Epithelial and Endothelial Cells. *Eukaryotic Cell* 8: 1498-1510.

- 811 Patil, S., R. S. Rao, B. Majumdar and S. Anil, 2015 Clinical Appearance of Oral Candida  
812 Infection and Therapeutic Strategies. *Frontiers in Microbiology* 6: 1391.
- 813 Pavelka, N., G. Rancati, J. Zhu, W. D. Bradford, A. Saraf *et al.*, 2010 Aneuploidy confers  
814 quantitative proteome changes and phenotypic variation in budding yeast. *Nature* 468:  
815 321-325.
- 816 Phan, Q. T., P. H. Belanger and S. G. Filler, 2000 Role of hyphal formation in interactions of  
817 *Candida albicans* with endothelial cells. *Infect. Immun.* 68: 3485-3490.
- 818 Polakova, S., C. Blume, J. A. Zarate, M. Mentel, D. Jorck-Ramberg *et al.*, 2009 Formation of  
819 new chromosomes as a virulence mechanism in yeast *Candida glabrata*. *Proc Natl Acad*  
820 *Sci U S A* 106: 2688-2693.
- 821 Richardson, M., and R. Rautemaa, 2009 How the host fights against *Candida* infections. *Front*  
822 *Biosci* 1: 246-257.
- 823 Rosenbach, A., D. Dignard, J. V. Pierce, M. Whiteway and C. A. Kumamoto, 2010 Adaptations  
824 of *Candida albicans* for Growth in the Mammalian Intestinal Tract. *Eukaryotic Cell* 9:  
825 1075-1086.
- 826 Rustchenko, E. P., D. H. Howard and F. Sherman, 1997 Variation in assimilating functions  
827 occurs in spontaneous *Candida albicans* mutants having chromosomal alterations.  
828 *Microbiology* 143: 1765-1778.
- 829 Schaller, M., C. Borelli, H. Korting and B. Hube, 2005 Hydrolytic enzymes as virulence factors of  
830 *Candida albicans*. *Mycoses* 48: 365 - 377.
- 831 Selmecki, A., S. Bergmann and J. Berman, 2005 Comparative genome hybridization reveals  
832 widespread aneuploidy in *Candida albicans* laboratory strains. *Molecular Microbiology*  
833 55: 1553-1565.
- 834 Selmecki, A., A. Forche and J. Berman, 2006 Aneuploidy and isochromosome formation in  
835 drug-resistant *Candida albicans*. *Science* 313: 367-370.

- 836 Sem, X., G. T. T. Le, A. S. M. Tan, G. Tso, M. Yurieva *et al.*, 2016  $\beta$ -glucan exposure on the  
837 fungal cell wall tightly correlates with competitive fitness of *Candida* species in the  
838 mouse gastrointestinal tract. *Frontiers in Cellular and Infection Microbiology* 6: 186.
- 839 Shrivastav, M., L. P. De Haro and J. A. Nickoloff, 2007 Regulation of DNA double-strand break  
840 repair pathway choice. *Cell Research* 18: 134.
- 841 Simpson, E. H., 1949 Measurement of diversity. *Nature* 163: 688.
- 842 Sionov, E., H. Lee, Y. C. Chang and K. J. Kwon-Chung, 2010 *Cryptococcus neoformans*  
843 overcomes stress of azole drugs by formation of disomy in specific multiple  
844 chromosomes. *PLoS Pathog* 6: e1000848.
- 845 Sobue, T., M. Bertolini, A. Thompson, D. E. Peterson, P. I. Diaz *et al.*, Chemotherapy-induced  
846 oral mucositis and associated infections in a novel organotypic model. *Molecular Oral*  
847 *Microbiology*: n/a-n/a.
- 848 Solis, N. V., and S. G. Filler, 2012 Mouse model of oropharyngeal candidiasis. *Nat. Protocols* 7:  
849 637-642.
- 850 Staib, P., S. Wirsching, A. Strauss and J. Morschhauser, 2001 Gene regulation and host  
851 adaptation mechanisms in *Candida albicans*. *Int J Med Microbiol* 291: 183-188.
- 852 Storchova, Z., A. Breneman, J. Cande, J. Dunn, K. Burbank *et al.*, 2006 Genome-wide genetic  
853 analysis of polyploidy in yeast. *Nature* 443: 541-547.
- 854 Takagi, Y., R. Akada, H. Kumagai, K. Yamamoto and H. Tamaki, 2008 Loss of heterozygosity is  
855 induced in *Candida albicans* by ultraviolet irradiation. *Applied Microbiology and*  
856 *Biotechnology* 77: 1073.
- 857 Thorburn, R. R., C. Gonzalez, G. A. Brar, S. Christen, T. M. Carlile *et al.*, 2013 Aneuploid yeast  
858 strains exhibit defects in cell growth and passage through START. *Molecular Biology of*  
859 *the Cell* 24: 1274-1289.
- 860 Torres, E. M., N. Dephoure, A. Panneerselvam, C. M. Tucker, C. A. Whittaker *et al.*, 2010  
861 Identification of aneuploidy-tolerating mutations. *Cell* 143: 71-83.

- 862 Torres, E. M., T. Sokolsky, C. M. Tucker, L. Y. Chan, M. Boselli *et al.*, 2007 Effects of  
863 aneuploidy on cellular physiology and cell division in haploid yeast. *Science* 317: 916-  
864 924.
- 865 Torres, E. M., B. R. Williams and A. Amon, 2008 Aneuploidy: Cells losing their balance.  
866 *Genetics* 179: 737-746.
- 867 Tsuchimori, N., L. L. Sharkey, W. A. Fonzi, S. W. French, J. E. Edwards *et al.*, 2000 Reduced  
868 Virulence of HWP1-Deficient Mutants of *Candida albicans* and Their Interactions with  
869 Host Cells. *Infection and Immunity* 68: 1997-2002.
- 870 van Het Hoog, M., T. J. Rast, M. Martchenko, S. Grindle, D. Dignard *et al.*, 2007 Assembly of  
871 the *Candida albicans* genome into sixteen supercontigs aligned on the eight  
872 chromosomes. *Genome Biol* 8: R52.
- 873 Vandeputte, P., F. Ischer, D. Sanglard and A. Coste, 2011 *In vivo* systematic analysis of  
874 *Candida albicans* Zn2-Cys6 transcription factors mutants for mice organ colonization.  
875 *PLOS One* 6: e26962.
- 876 Vargas, K. G., and S. Joly, 2002 Carriage Frequency, Intensity of Carriage, and Strains of Oral  
877 Yeast Species Vary in the Progression to Oral Candidiasis in Human Immunodeficiency  
878 Virus-Positive Individuals. *Journal of Clinical Microbiology* 40: 341-350.
- 879 Villar, C. C., and A. Dongari-Bagtzoglou, 2008 Immune defence mechanisms and  
880 immunoenhancement strategies in oropharyngeal candidiasis. *Expert Reviews in*  
881 *Molecular Medicine* 10.
- 882 Wilson, D., S. Thewes, K. Zakikhany, C. Fradin, A. Albrecht *et al.*, 2009 Identifying infection-  
883 associated genes of *Candida albicans* in the postgenomic era. *FEMS Yeast Res* 9: 688-  
884 700.

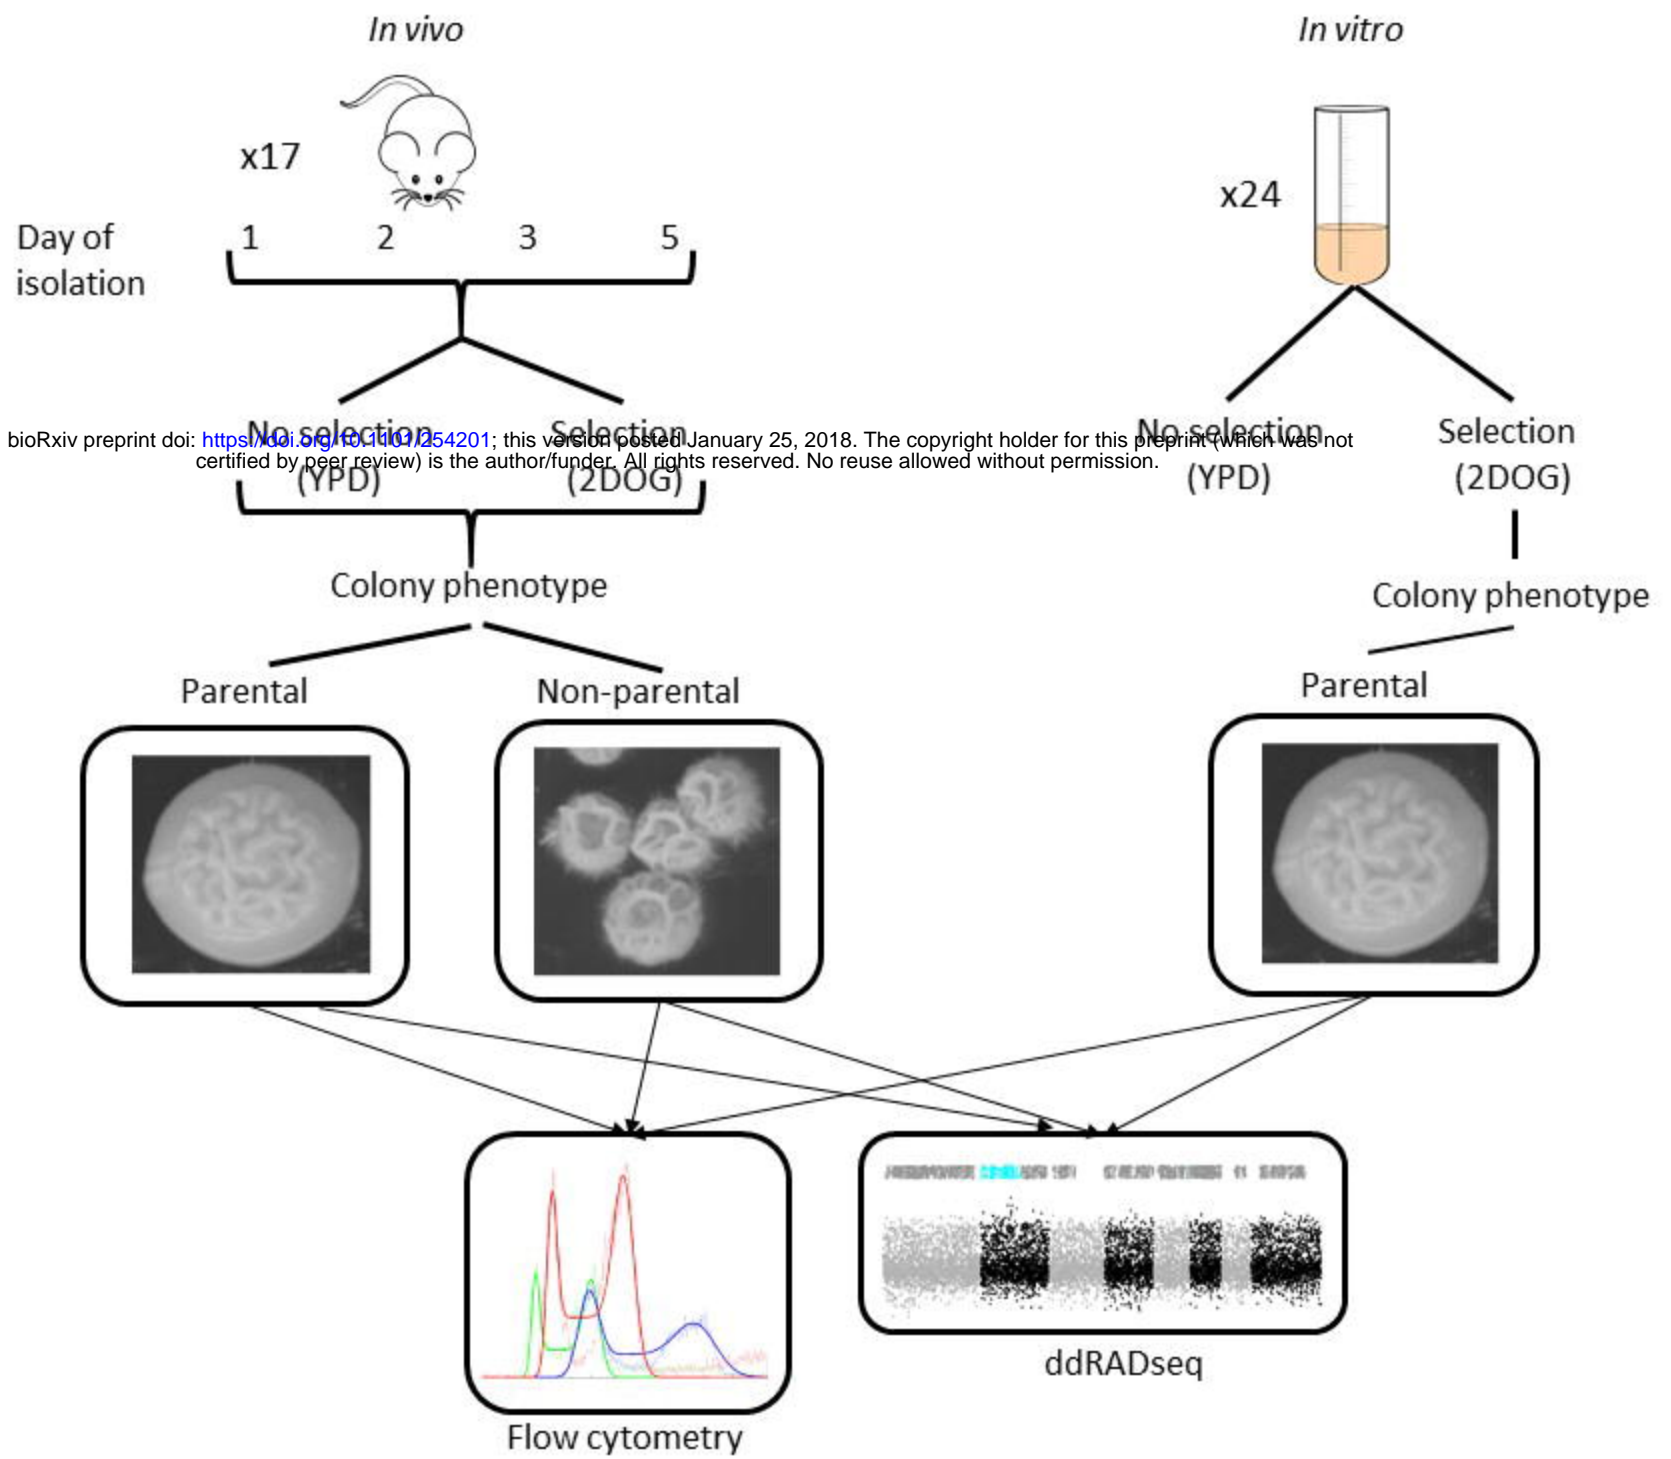

**A**

YPD

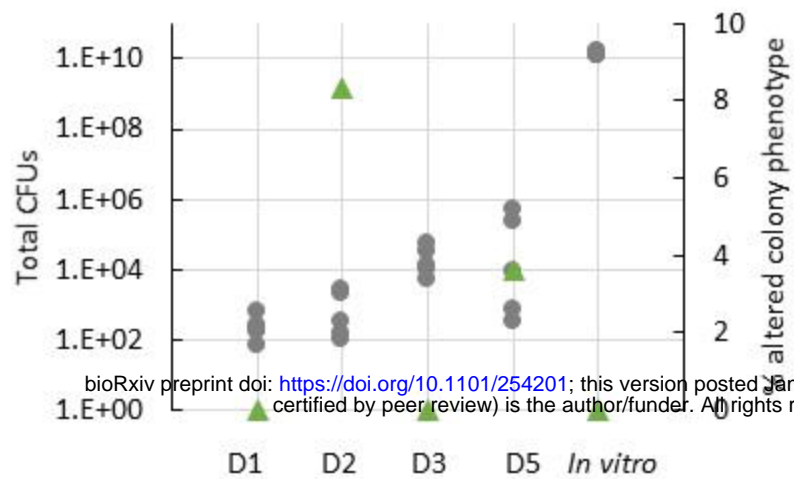

2DOG

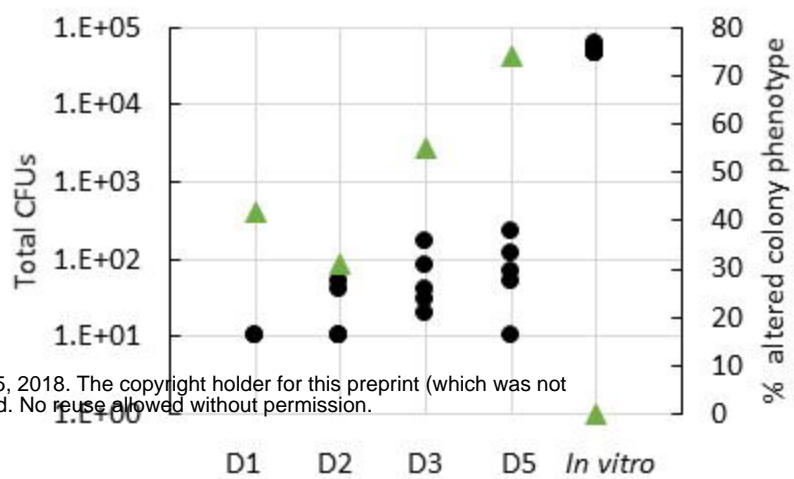**B**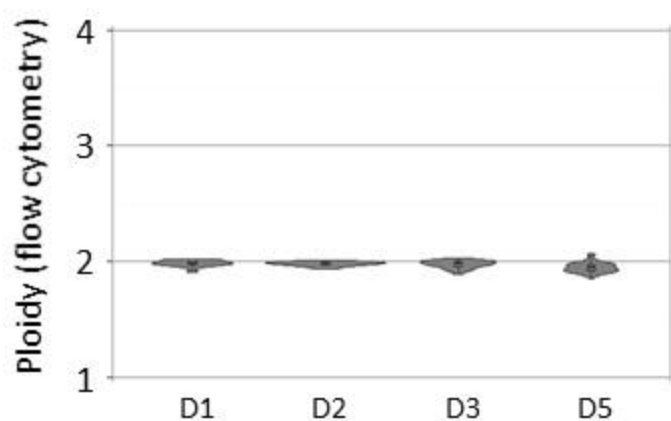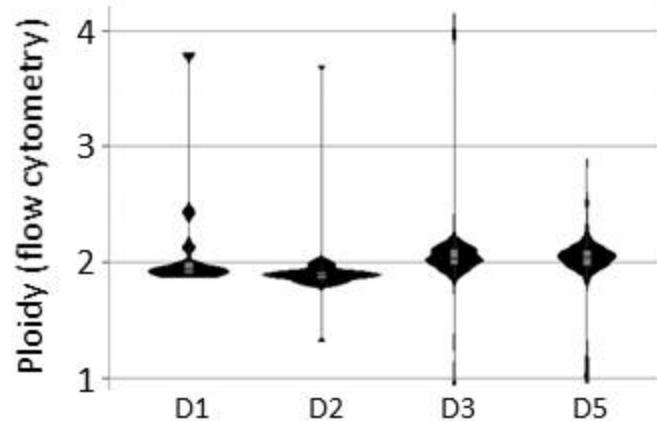**C**

overall

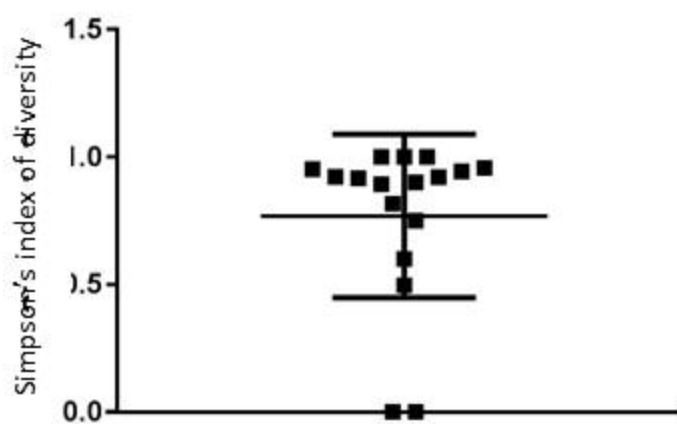

by day

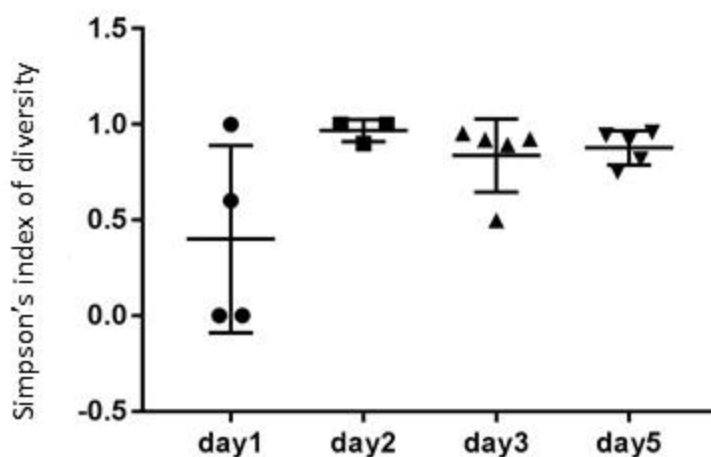**D**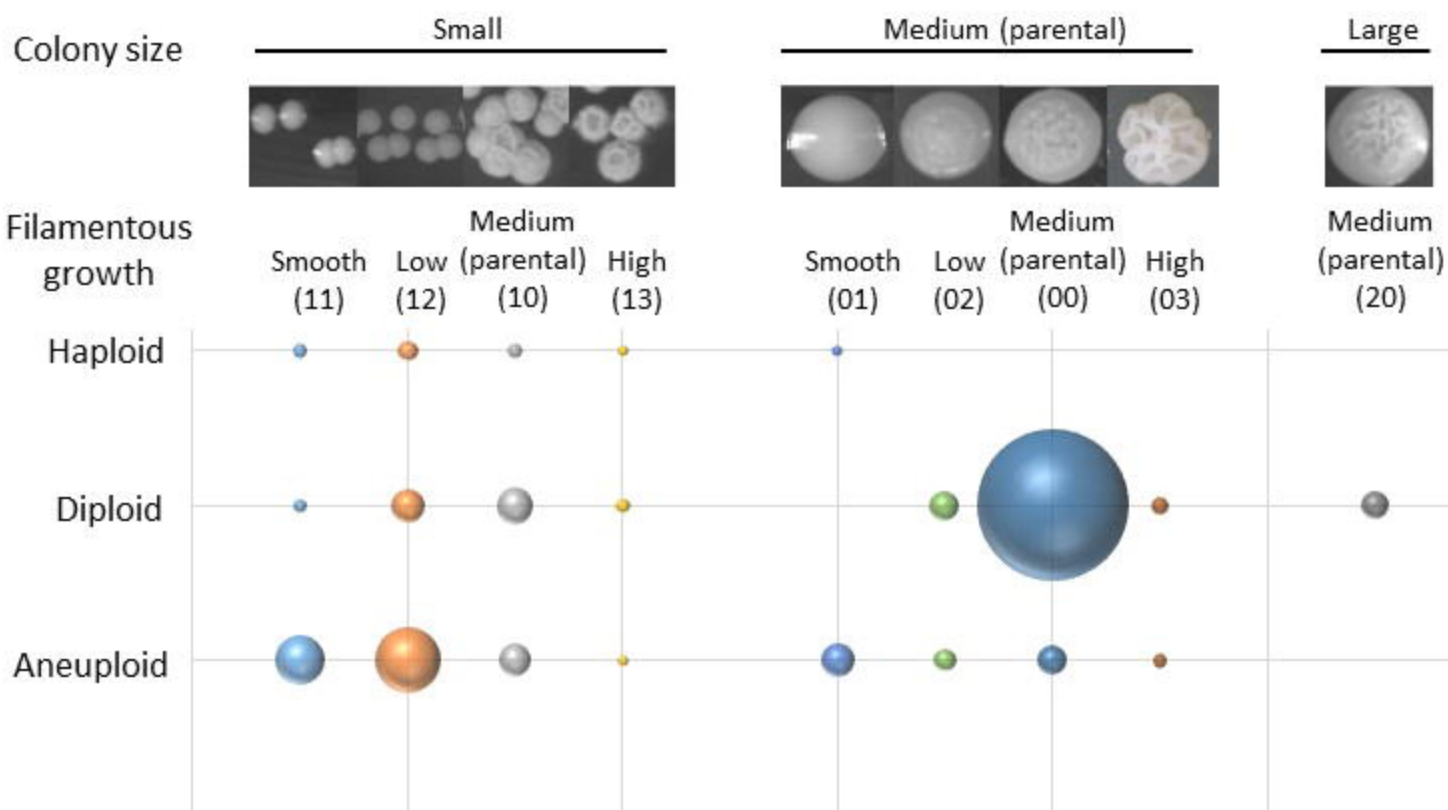

FIG2

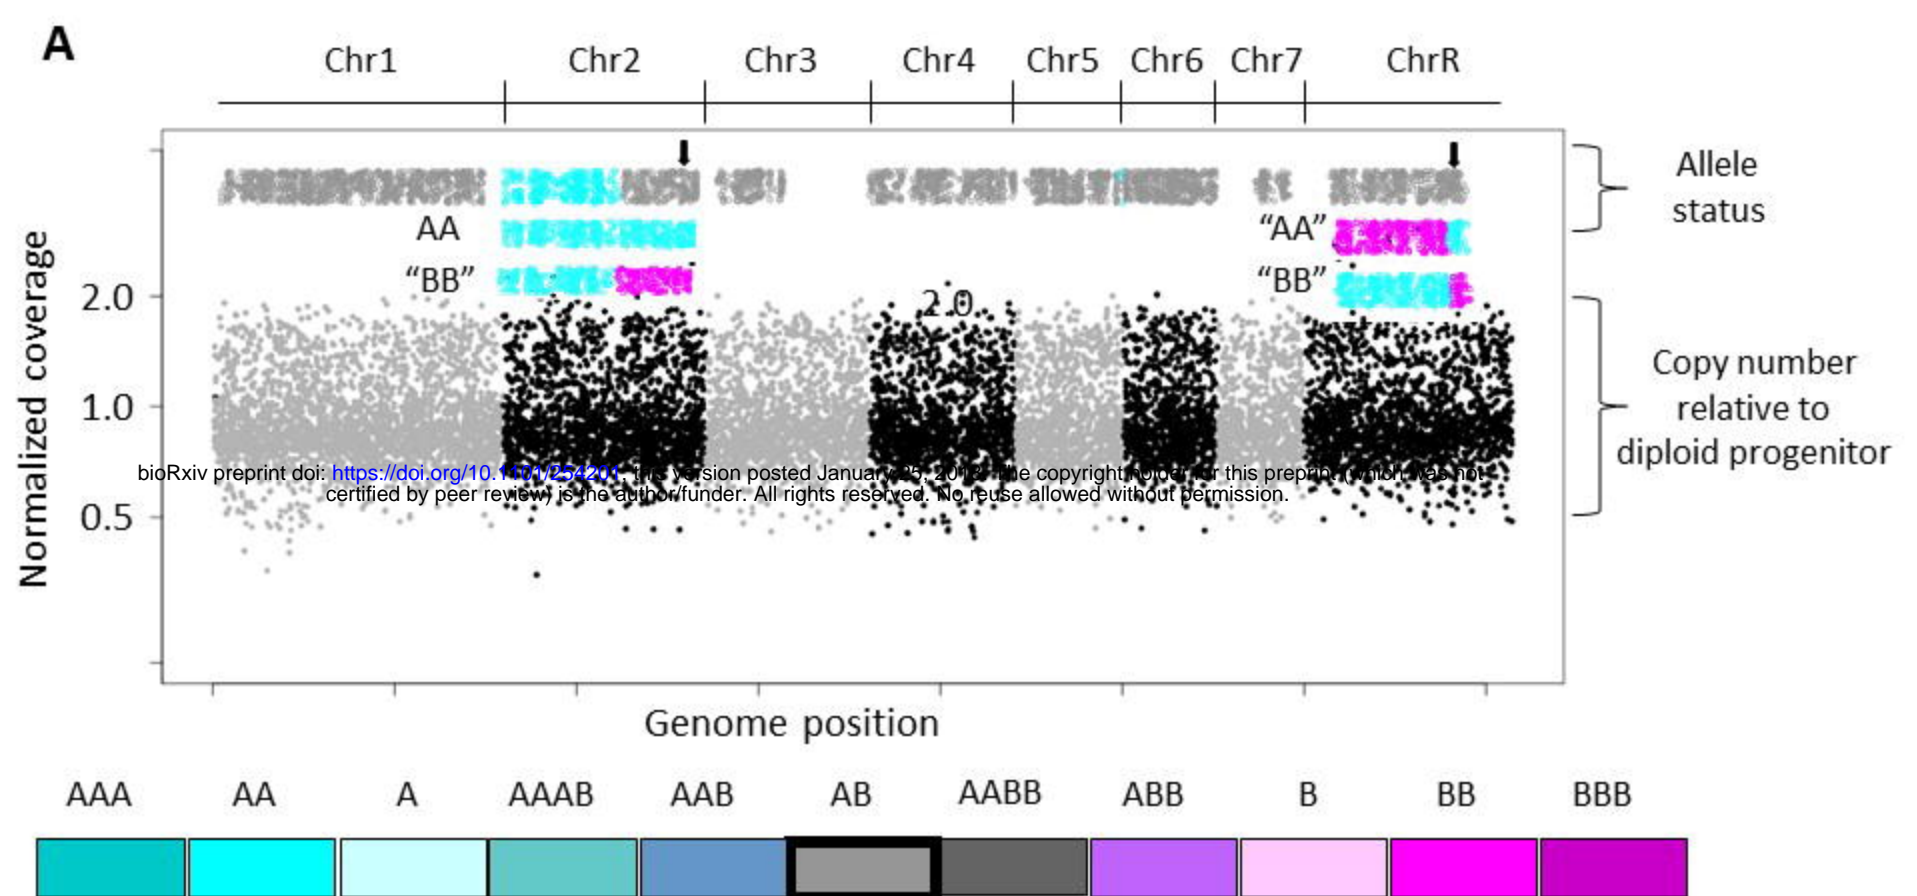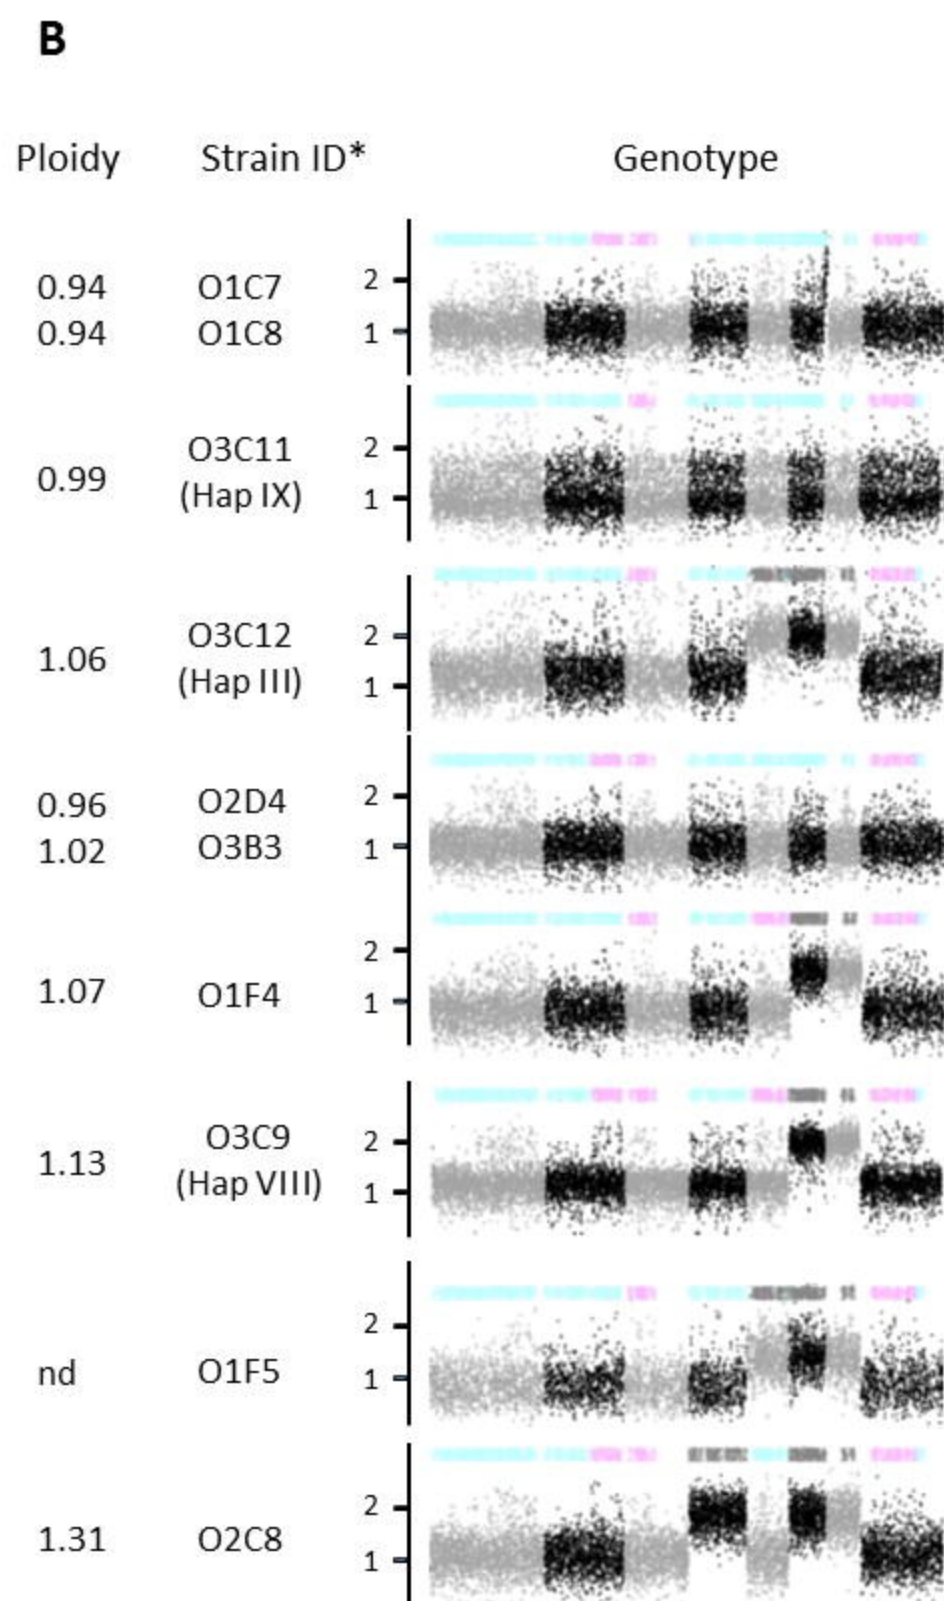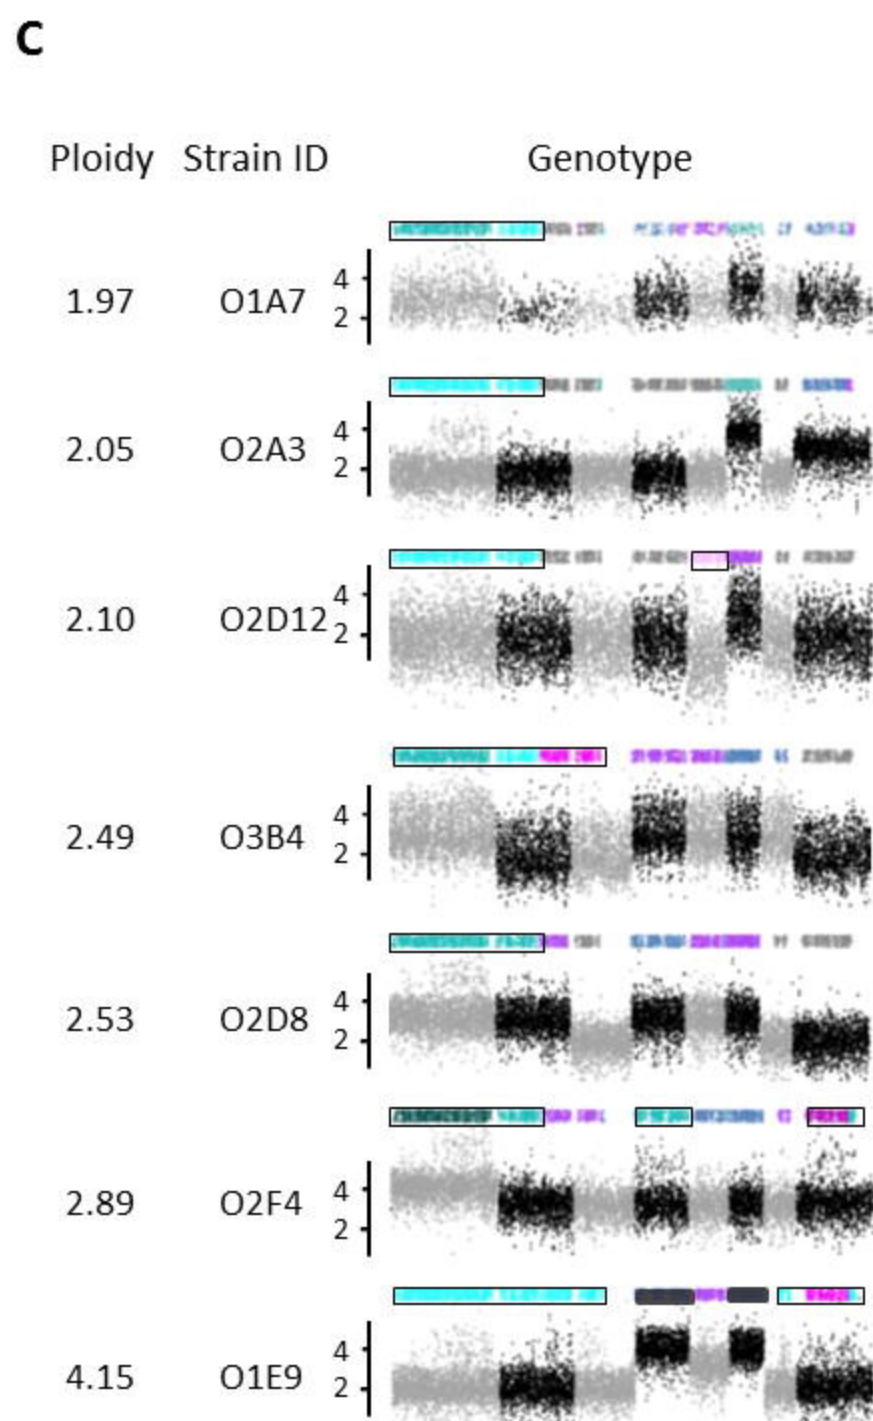

**A**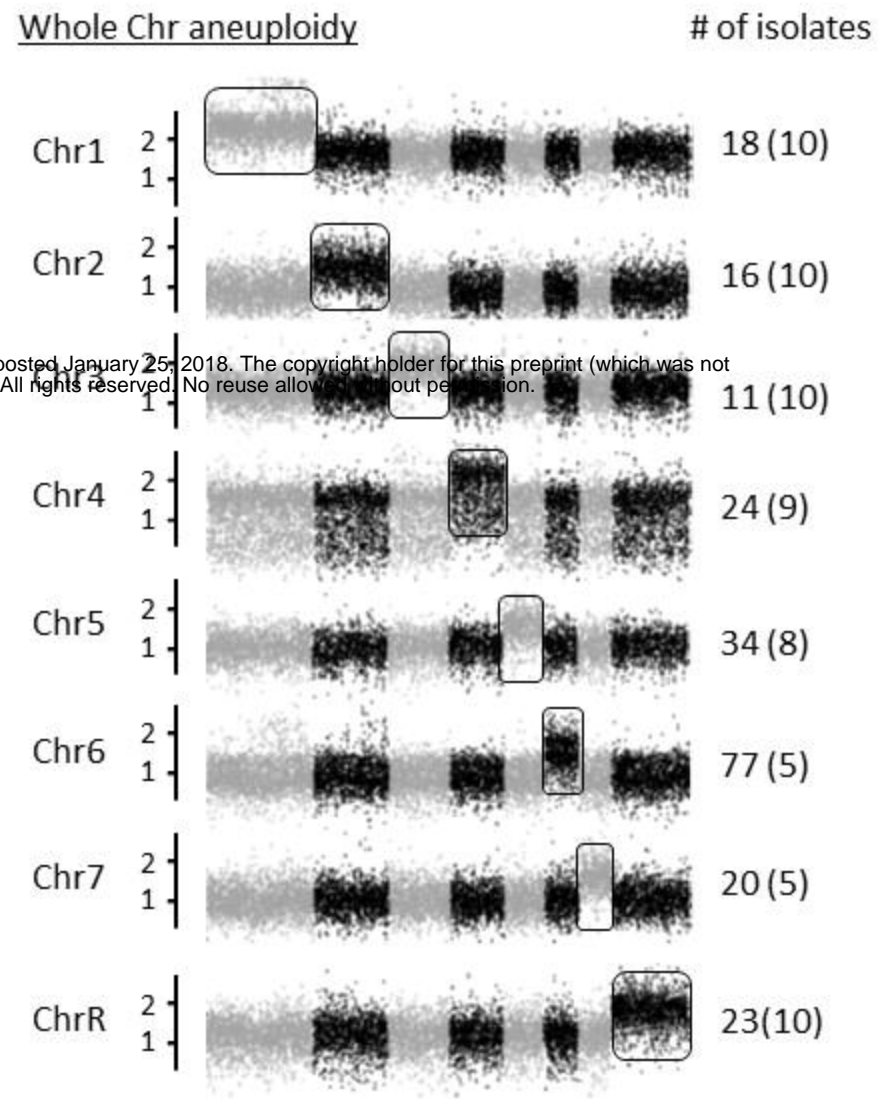**B**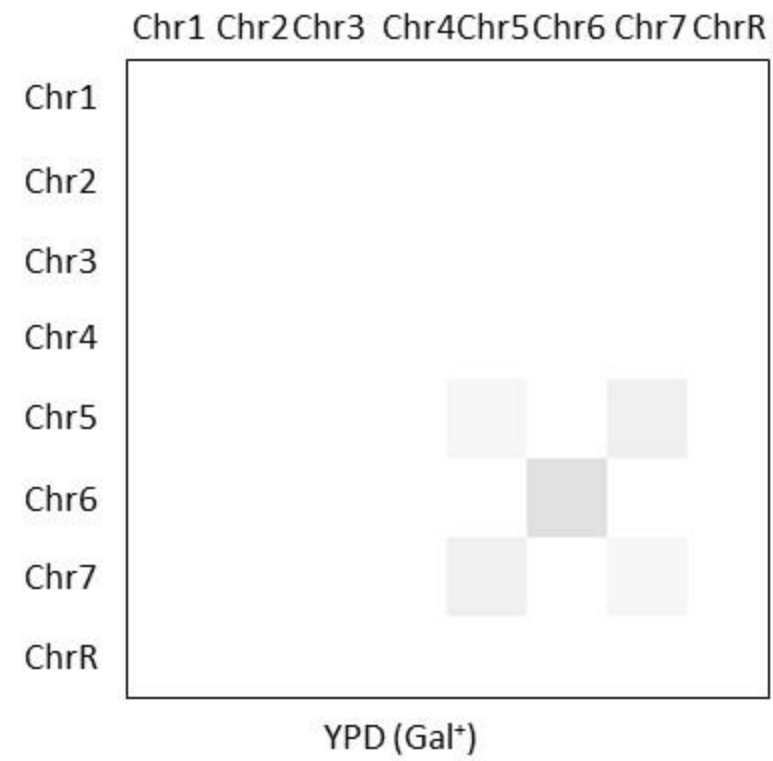**C**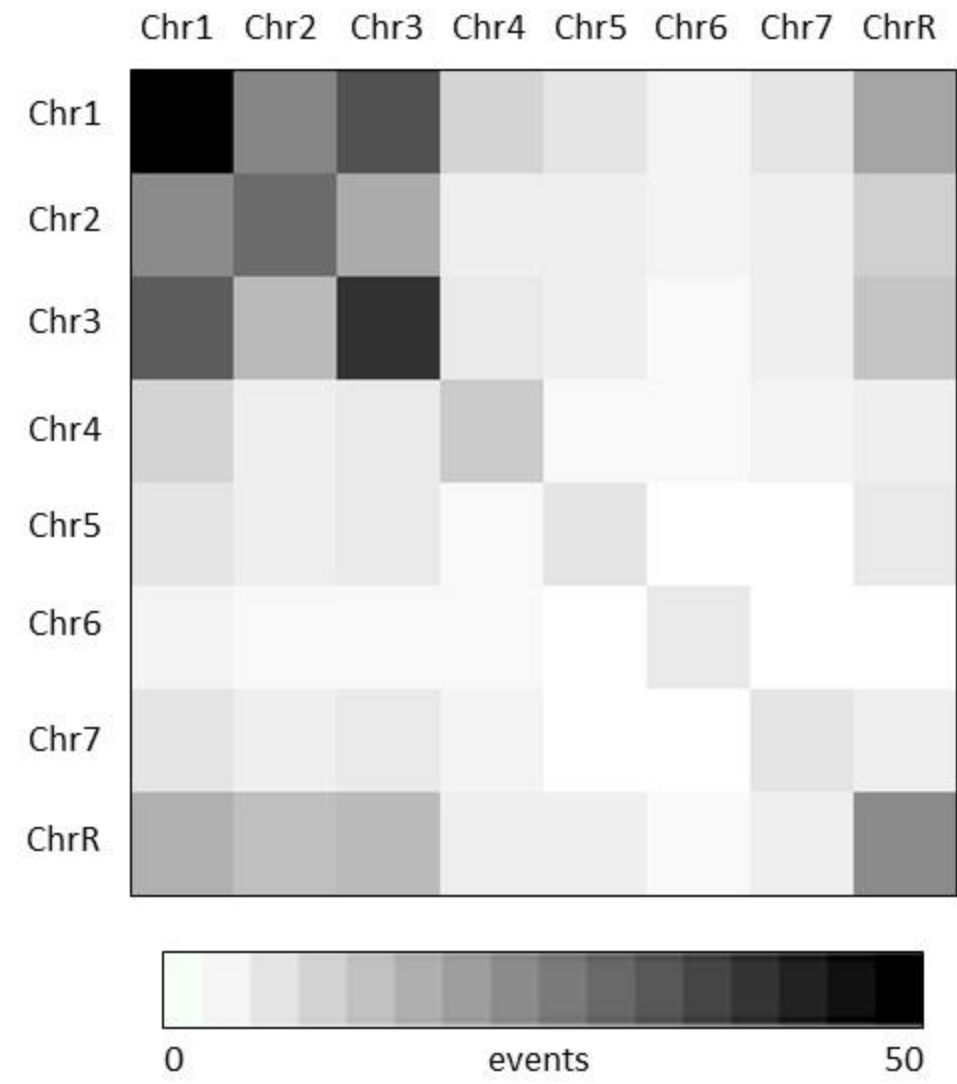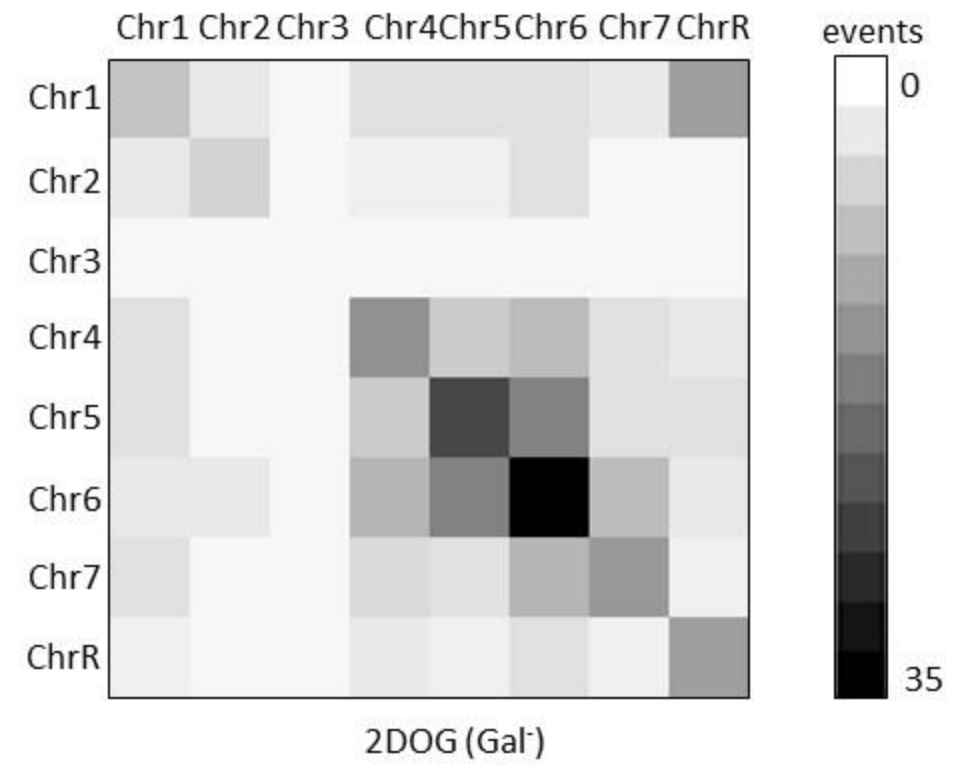



**A**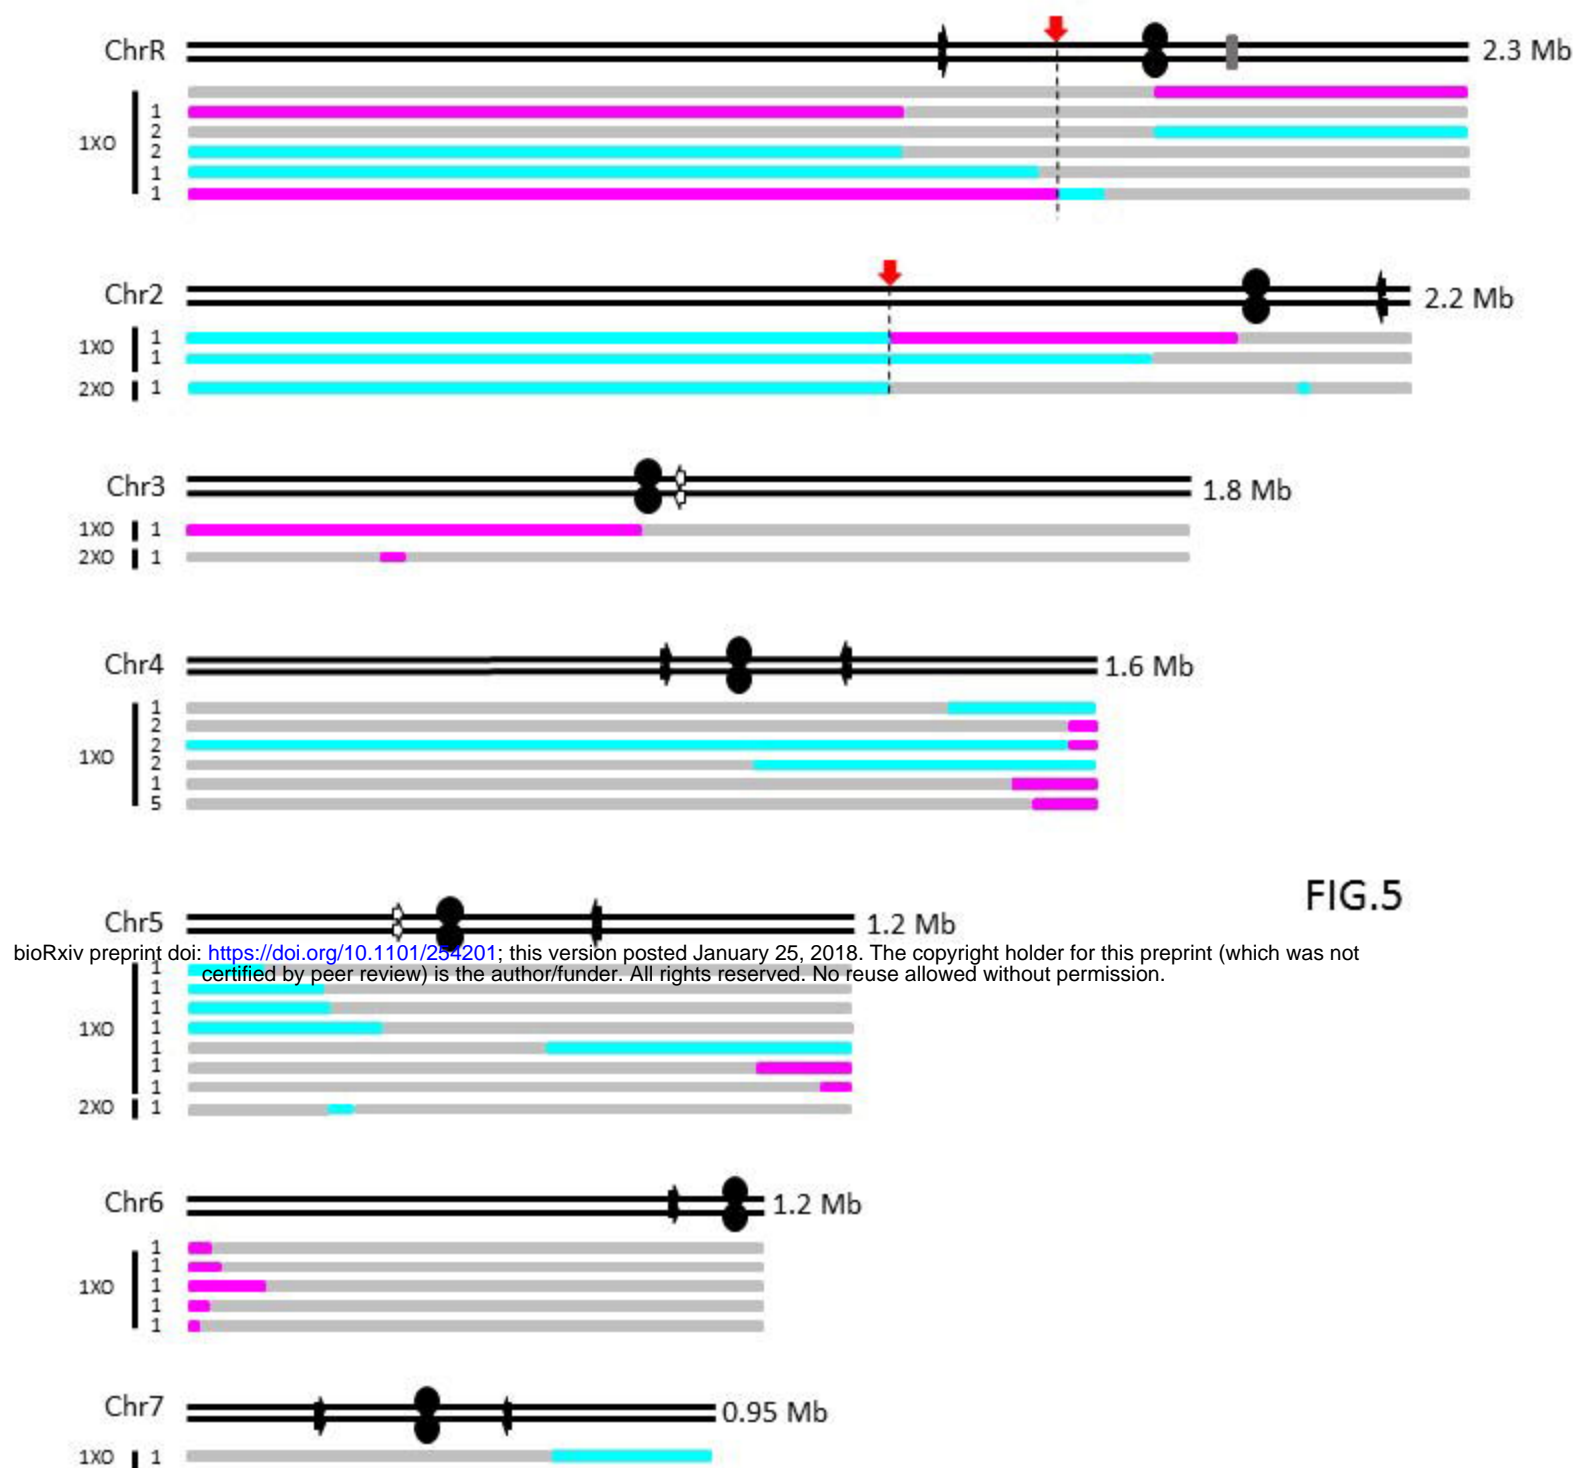**FIG.5**

bioRxiv preprint doi: <https://doi.org/10.1101/254201>; this version posted January 25, 2018. The copyright holder for this preprint (which was not certified by peer review) is the author/funder. All rights reserved. No reuse allowed without permission.

**B**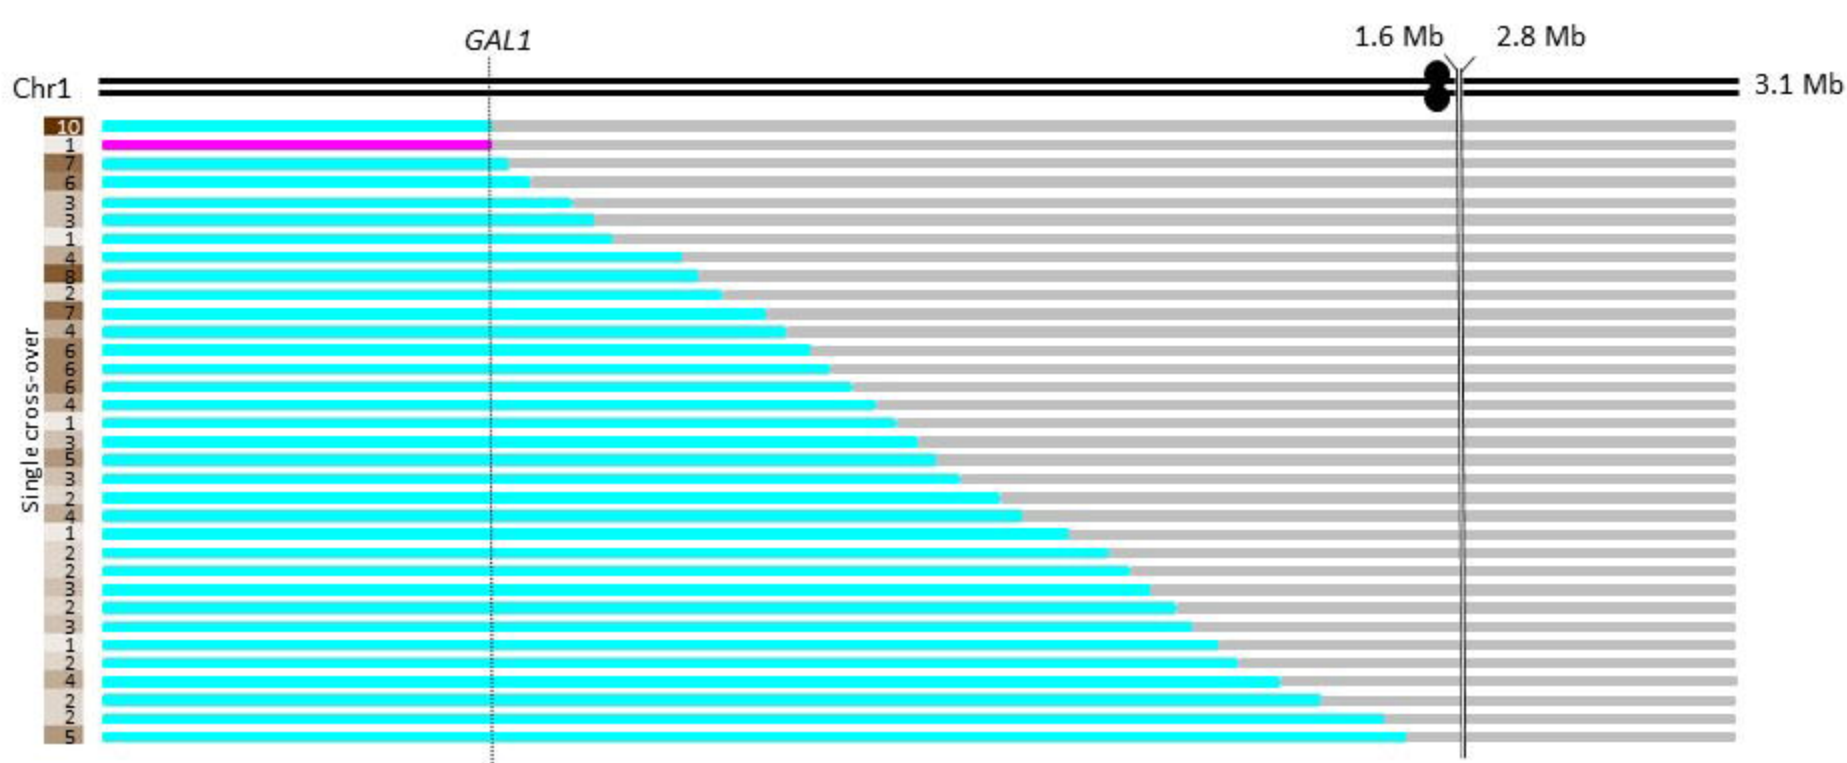**C**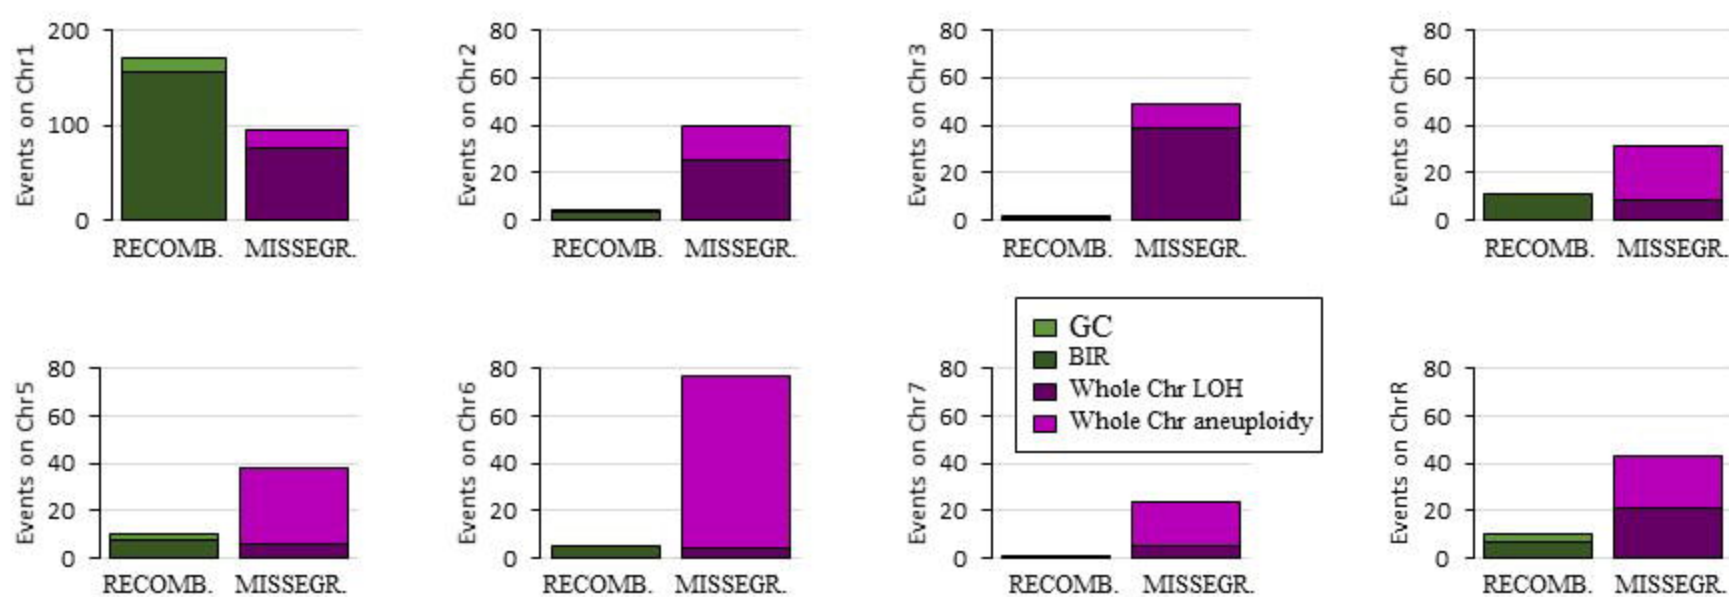

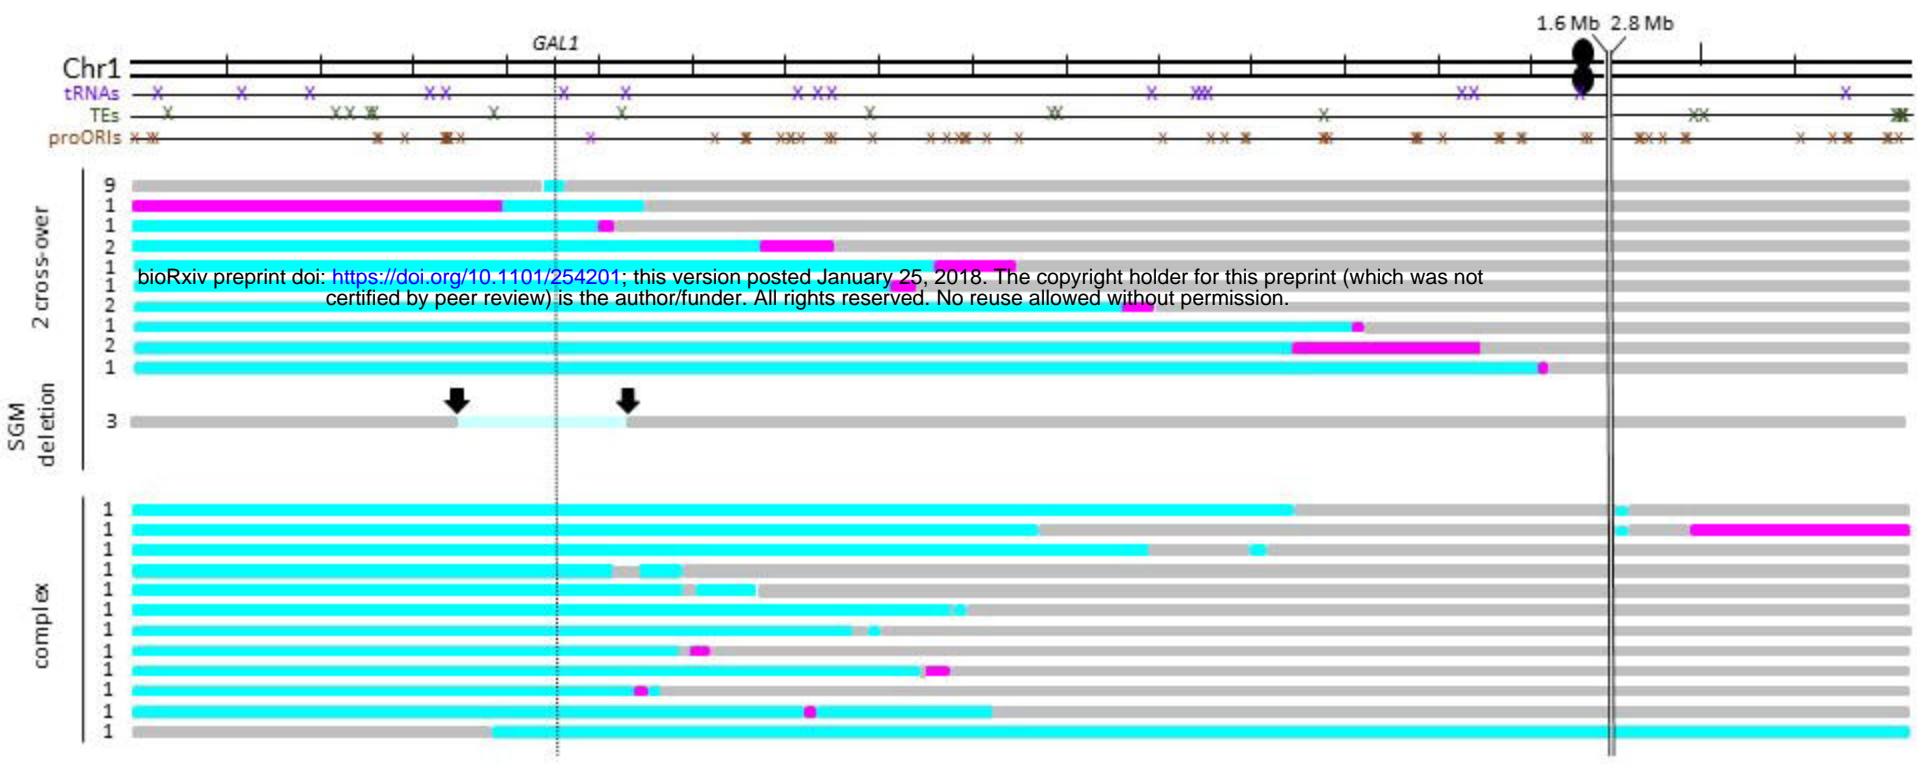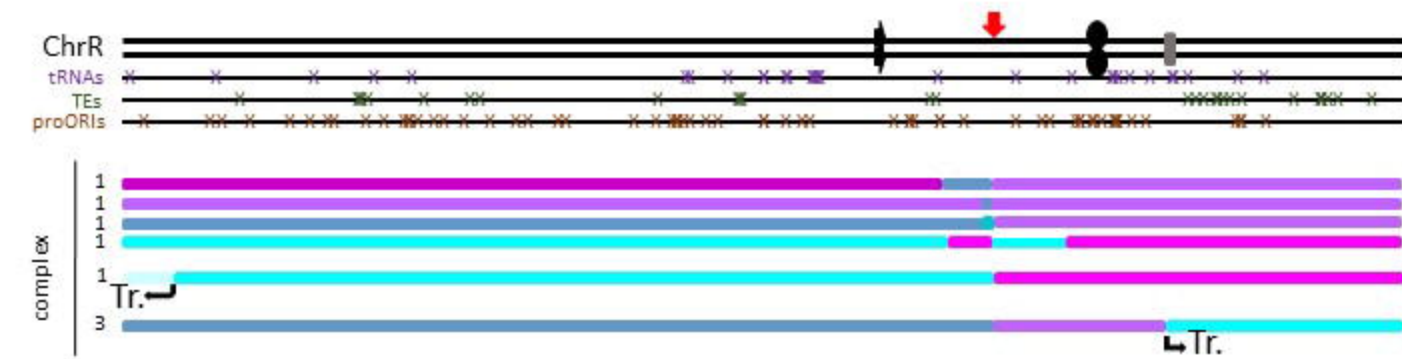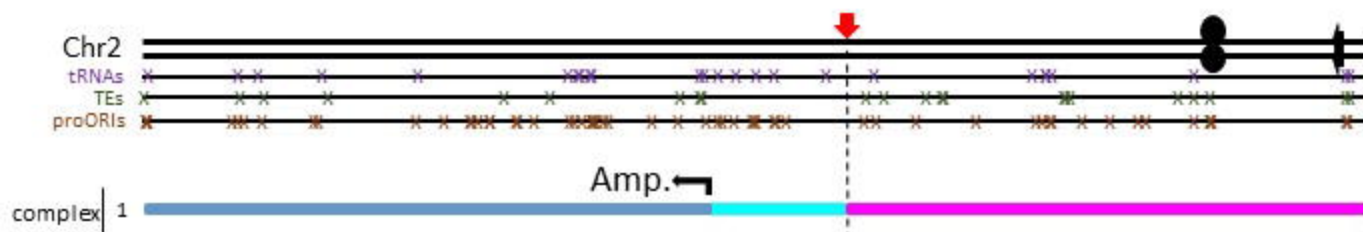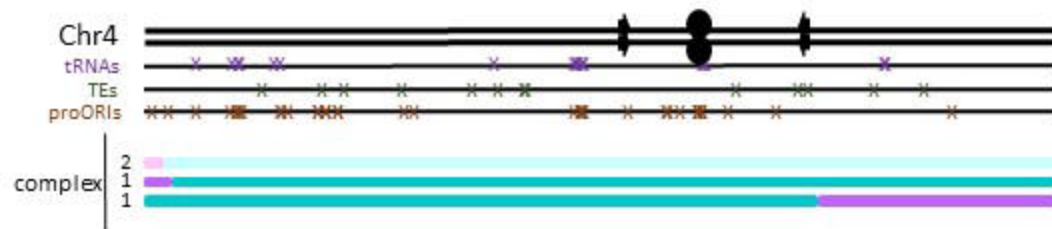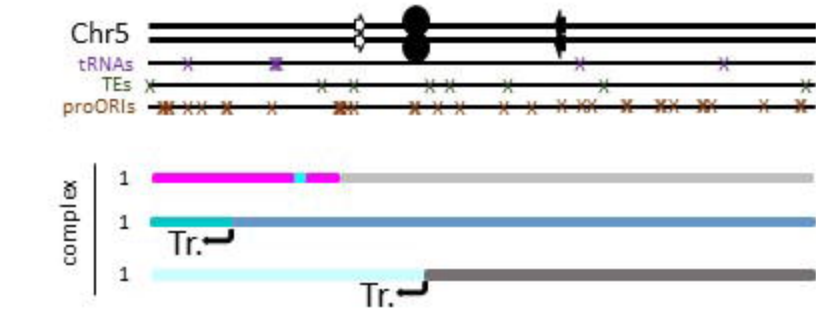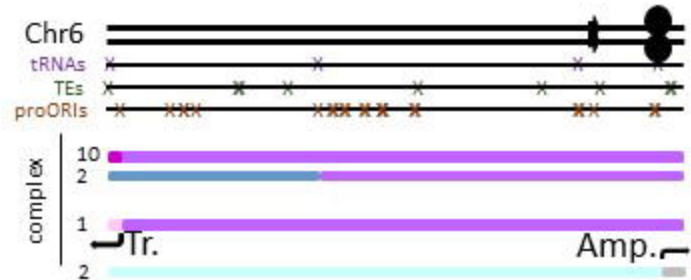

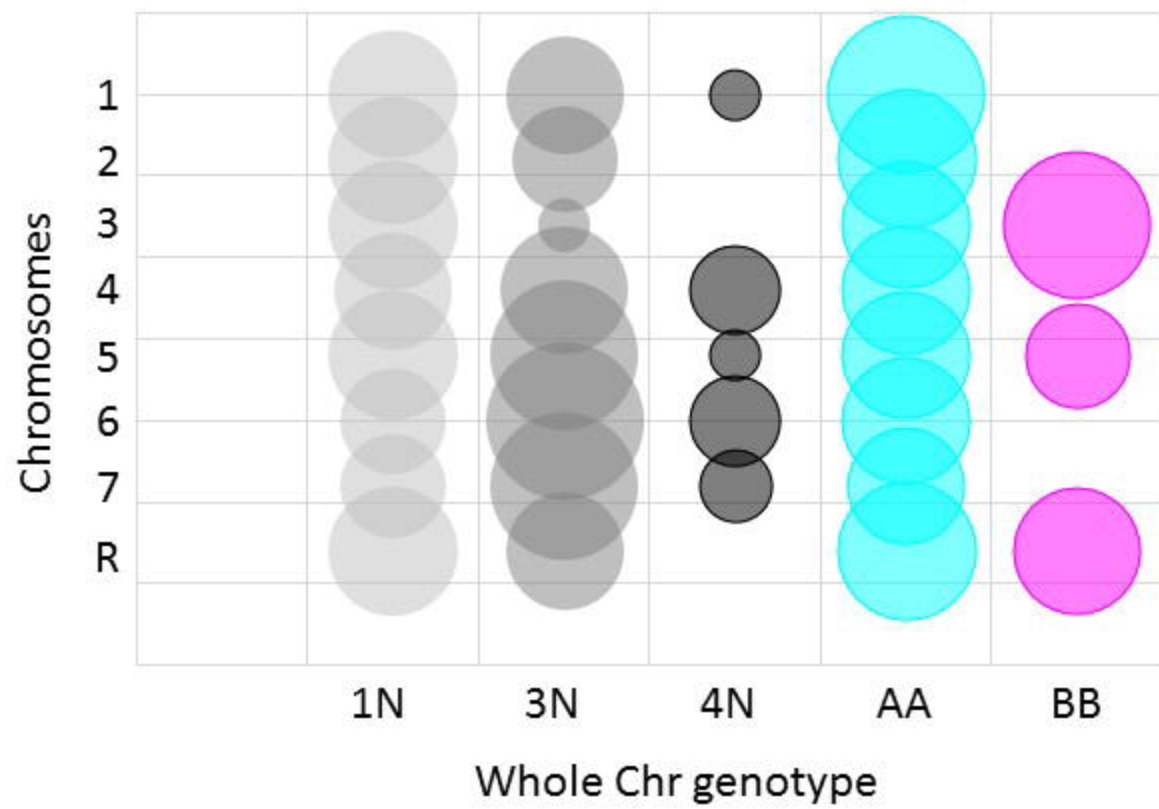

**A**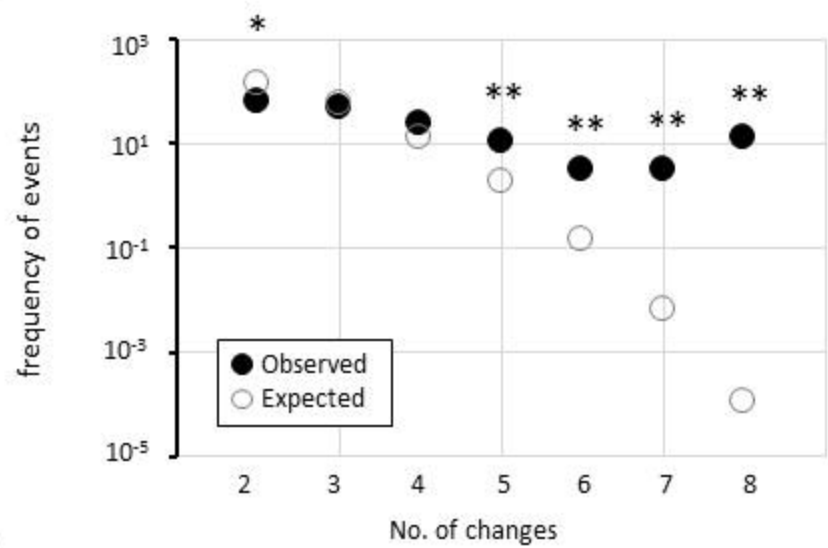**B**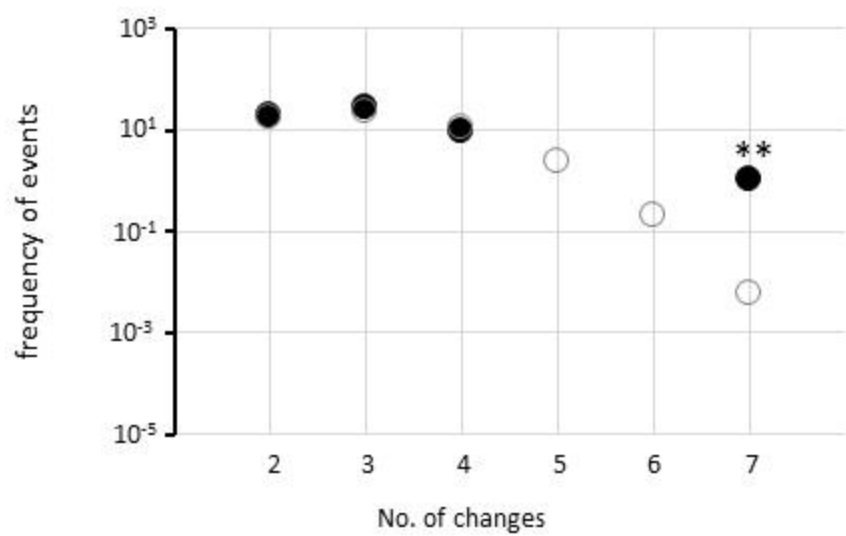**C**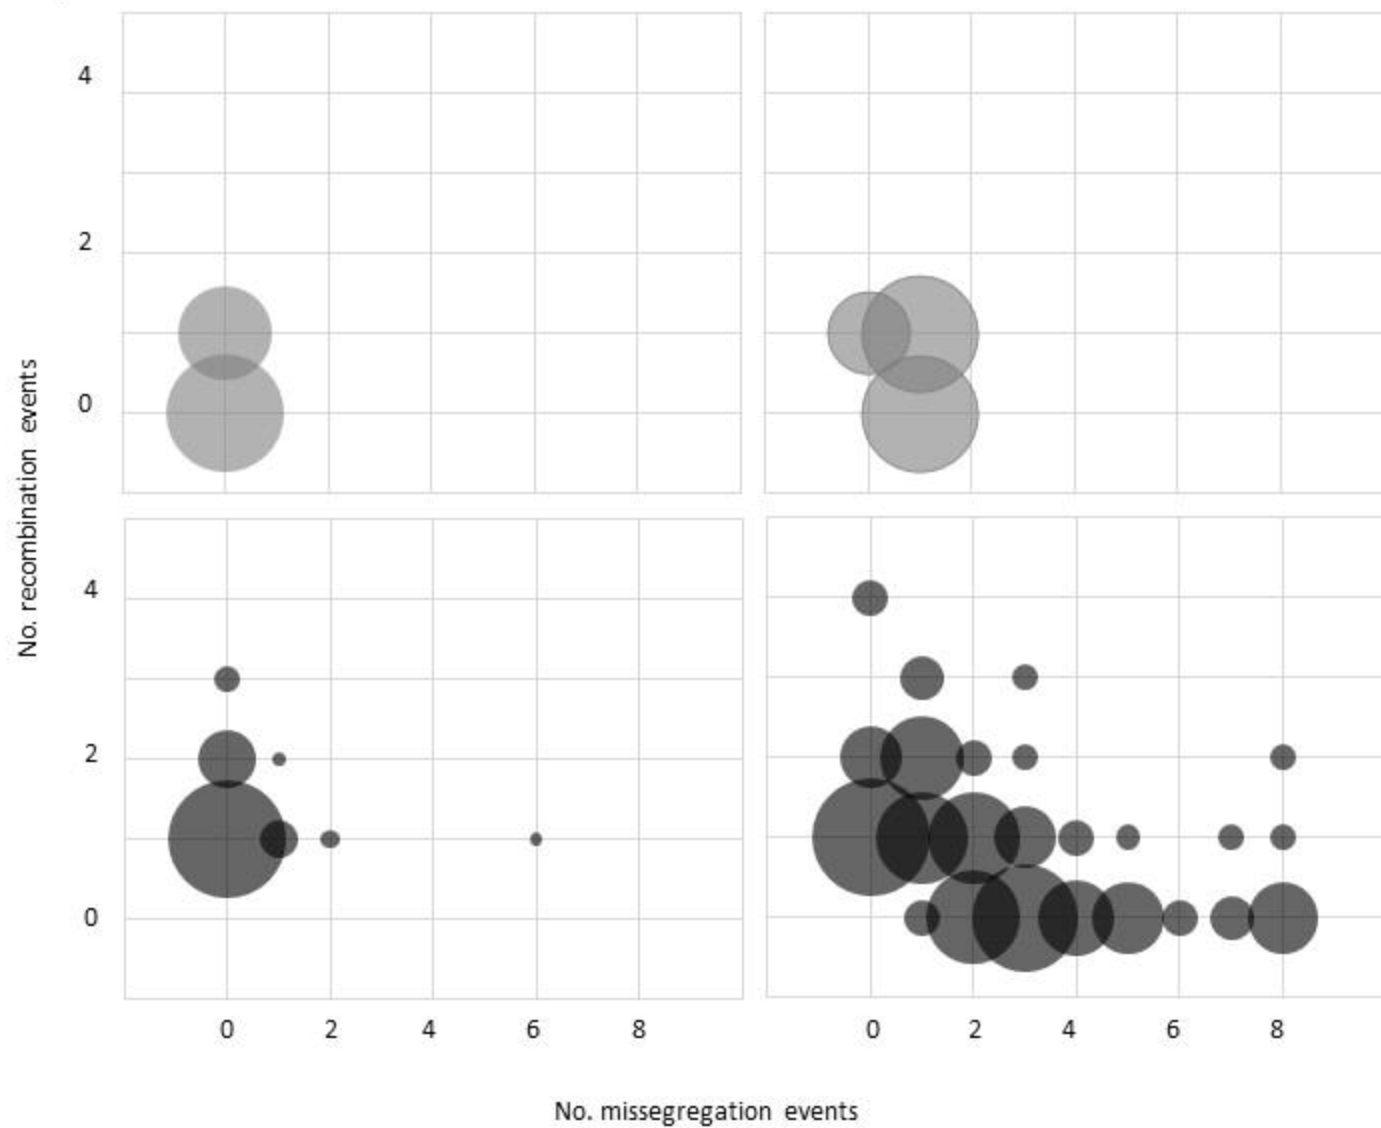**FIG.8**
